# Supplementary material for: DNA Barcode Library of Megadiverse Lepidoptera in an Alpine Nature Park (Italy) Reveals Unexpected Species Diversity
Source: MDPI journal article supplement (doi:10.3390/d15020214), 2023-02-02
Supplement: s1 [file s1]

**Table S1:** List of sequenced taxa from study area, BINs, number of BIN members in BOLD and No. of BIN members from study area.

| Family          | Taxon                             | BIN          | No. BIN-<br>BOLD | No.<br>BIN-SA |
|-----------------|-----------------------------------|--------------|------------------|---------------|
| Adelidae        | <i>Adela australis</i>            | BOLD:ABU5935 | 3                | 1             |
| Adelidae        | <i>Nematopogon metaxella</i>      | BOLD:AAD4156 | 23               | 1             |
| Adelidae        | <i>Nematopogon swammerdamella</i> | BOLD:AAD1739 | 48               | 2             |
| Adelidae        | <i>Nemophora metallica</i>        | BOLD:AEF7386 | 2                | 1             |
| Argyresthiidae  | <i>Argyresthia abdominalis</i>    | BOLD:AAF5185 | 45               | 2             |
| Argyresthiidae  | <i>Argyresthia albistria</i>      | BOLD:AAD9653 | 55               | 2             |
| Argyresthiidae  | <i>Argyresthia amiantella</i>     | BOLD:AAJ1583 | 13               | 2             |
| Argyresthiidae  | <i>Argyresthia bonnetella</i>     | BOLD:AAD9604 | 38               | 1             |
| Argyresthiidae  | <i>Argyresthia brockeella</i>     | BOLD:AAD2486 | 29               | 1             |
| Argyresthiidae  | <i>Argyresthia conjugella</i>     | BOLD:ADJ7400 | 71               | 1             |
| Argyresthiidae  | <i>Argyresthia dilectella</i>     | BOLD:AAJ1572 | 14               | 1             |
| Argyresthiidae  | <i>Argyresthia goedartella</i>    | BOLD:AAA8888 | 51               | 1             |
| Argyresthiidae  | <i>Argyresthia laevigatella</i>   | BOLD:AAJ1571 | 20               | 1             |
| Argyresthiidae  | <i>Argyresthia pruniella</i>      | BOLD:AAC2750 | 91               | 2             |
| Argyresthiidae  | <i>Argyresthia semitestacella</i> | BOLD:ABY9726 | 30               | 1             |
| Argyresthiidae  | <i>Argyresthia sorbiella</i>      | BOLD:AAD9497 | 37               | 1             |
| Argyresthiidae  | <i>Argyresthia spinosella</i>     | BOLD:AAE6255 | 497              | 1             |
| Autostichidae   | <i>Apatema apolausticum</i>       | BOLD:AAP6345 | 12               | 2             |
| Autostichidae   | <i>Apatema whalleyi</i>           | BOLD:AAJ1448 | 12               | 1             |
| Autostichidae   | <i>Oegoconia uralskella</i>       | BOLD:AAK3087 | 42               | 2             |
| Autostichidae   | <i>Symmoca signella</i>           | BOLD:AAD4700 | 16               | 3             |
| Batrachedridae  | <i>Batrachedra confusella</i>     | BOLD:AAF0077 | 76               | 1             |
| Bedelliidae     | <i>Bedellia somnulentella</i>     | BOLD:AAI7774 | 130              | 1             |
| Blastobasidae   | <i>Blastobasis glandulella</i>    | BOLD:AAB1096 | 183              | 1             |
| Blastobasidae   | <i>Blastobasis phycidella</i>     | BOLD:AAF0414 | 70               | 2             |
| Blastobasidae   | <i>Hypatopa binotella</i>         | BOLD:AAB7100 | 61               | 1             |
| Brahmaeidae     | <i>Lemonia taraxaci</i>           | BOLD:ABZ7836 | 5                | 2             |
| Bucculatricidae | <i>Bucculatrix clavenae</i>       | BOLD:AEA2548 | 3                | 3             |
| Bucculatricidae | <i>Bucculatrix frangutella</i>    | BOLD:AAI8491 | 42               | 1             |
| Bucculatricidae | <i>Bucculatrix ulmella</i>        | BOLD:AAI8482 | 62               | 1             |
| Choreutidae     | <i>Anthophila fabriciana</i>      | BOLD:AAC8582 | 71               | 1             |
| Choreutidae     | <i>Prochoreutis stellaris</i>     | BOLD:ACA9570 | 6                | 3             |
| Choreutidae     | <i>Tebenna bjerkanarella</i>      | BOLD:AAK0844 | 22               | 1             |
| Coleophoridae   | <i>Coleophora absinthii</i>       | BOLD:AAE8865 | 6                | 1             |
| Coleophoridae   | <i>Coleophora adjectella</i>      | BOLD:AAS0375 | 12               | 1             |
| Coleophoridae   | <i>Coleophora albella</i>         | BOLD:AAE1420 | 25               | 1             |
| Coleophoridae   | <i>Coleophora albicostella</i>    | BOLD:AAO2793 | 29               | 2             |
| Coleophoridae   | <i>Coleophora albidella</i>       | BOLD:AAB8489 | 109              | 1             |
| Coleophoridae   | <i>Coleophora alticolella</i>     | BOLD:AAC6419 | 183              | 2             |
| Coleophoridae   | <i>Coleophora amellivora</i>      | BOLD:AAE1243 | 12               | 2             |
| Coleophoridae   | <i>Coleophora argentula</i>       | BOLD:AAI5953 | 83               | 10            |
| Coleophoridae   | <i>Coleophora badiipennella</i>   | BOLD:ABY4266 | 46               | 1             |
| Coleophoridae   | <i>Coleophora caespititiella</i>  | BOLD:AAE8821 | 68               | 2             |

|                 |                                     |              |     |    |
|-----------------|-------------------------------------|--------------|-----|----|
| Coleophoridae   | <i>Coleophora chamaedriella</i>     | BOLD:AAF4151 | 13  | 2  |
| Coleophoridae   | <i>Coleophora coronillae</i>        | BOLD:AAJ7034 | 34  | 2  |
| Coleophoridae   | <i>Coleophora ditella</i>           | BOLD:AAJ9671 | 31  | 1  |
| Coleophoridae   | <i>Coleophora frischella</i>        | BOLD:AAC6862 | 33  | 2  |
| Coleophoridae   | <i>Coleophora gryphipennella</i>    | BOLD:AAE8826 | 35  | 2  |
| Coleophoridae   | <i>Coleophora gryphipennella</i>    | BOLD:ACJ2968 | 5   | 1  |
| Coleophoridae   | <i>Coleophora laricella</i>         | BOLD:AAB4768 | 149 | 2  |
| Coleophoridae   | <i>Coleophora lithargyrinella</i>   | BOLD:AET5871 | 1   | 1  |
| Coleophoridae   | <i>Coleophora lixella</i>           | BOLD:AAB2196 | 55  | 3  |
| Coleophoridae   | <i>Coleophora lusciniaepennella</i> | BOLD:AAJ9622 | 97  | 1  |
| Coleophoridae   | <i>Coleophora mayrella</i>          | BOLD:AAB3182 | 130 | 1  |
| Coleophoridae   | <i>Coleophora nepetellae</i>        | BOLD:AAB2198 | 19  | 2  |
| Coleophoridae   | <i>Coleophora niveicostella</i>     | BOLD:AAO4711 | 32  | 2  |
| Coleophoridae   | <i>Coleophora nubivagella</i>       | BOLD:AAE1250 | 42  | 16 |
| Coleophoridae   | <i>Coleophora nutantella</i>        | BOLD:AAE1255 | 91  | 1  |
| Coleophoridae   | <i>Coleophora ornatipennella</i>    | BOLD:AAB2195 | 63  | 2  |
| Coleophoridae   | <i>Coleophora pennella</i>          | BOLD:AAO3477 | 33  | 2  |
| Coleophoridae   | <i>Coleophora pratella</i>          | BOLD:ABV9515 | 3   | 1  |
| Coleophoridae   | <i>Coleophora pseudodirectella</i>  | BOLD:AAB5953 | 81  | 1  |
| Coleophoridae   | <i>Coleophora pseudosquamosella</i> | BOLD:ACE3745 | 22  | 5  |
| Coleophoridae   | <i>Coleophora repentis</i>          | BOLD:AAO2402 | 12  | 4  |
| Coleophoridae   | <i>Coleophora retrodentella</i>     | BOLD:AAO2403 | 3   | 1  |
| Coleophoridae   | <i>Coleophora rudella</i>           | BOLD:AEF7329 | 4   | 3  |
| Coleophoridae   | <i>Coleophora serratella</i>        | BOLD:AAB5543 | 235 | 1  |
| Coleophoridae   | <i>Coleophora silenella</i>         | BOLD:AAE1255 | 91  | 3  |
| Coleophoridae   | <i>Coleophora sylvaticella</i>      | BOLD:AAJ7030 | 61  | 2  |
| Coleophoridae   | <i>Coleophora tricolor</i>          | BOLD:AAE8791 | 9   | 1  |
| Coleophoridae   | <i>Coleophora trifolii</i>          | BOLD:AAA7670 | 125 | 1  |
| Coleophoridae   | <i>Coleophora trigeminella</i>      | BOLD:AAD9304 | 32  | 1  |
| Coleophoridae   | <i>Coleophora vestianella</i>       | BOLD:AAI5954 | 44  | 6  |
| Coleophoridae   | <i>Coleophora vulpecula</i>         | BOLD:ACT0442 | 2   | 1  |
| Cosmopterigidae | <i>Eteobalea albiapicella</i>       | BOLD:AAO3401 | 27  | 2  |
| Cosmopterigidae | <i>Pancalia schwarzella</i>         | BOLD:AAI4950 | 16  | 1  |
| Cosmopterigidae | <i>Pyroderces klimeschi</i>         | BOLD:ADK8595 | 5   | 1  |
| Cossidae        | <i>Cossus cossus</i>                | BOLD:AAP5664 | 16  | 1  |
| Cossidae        | <i>Dyspessa ulula</i>               | BOLD:AAK9849 | 9   | 4  |
| Crambidae       | <i>Agriphila straminella</i>        | BOLD:AAC0267 | 201 | 2  |
| Crambidae       | <i>Agriphila tristella</i>          | BOLD:AAB9062 | 62  | 1  |
| Crambidae       | <i>Agriphila tristella</i>          | BOLD:ACK2123 | 12  | 1  |
| Crambidae       | <i>Anania hortulata</i>             | BOLD:AAB0989 | 92  | 2  |
| Crambidae       | <i>Anania terrealis</i>             | BOLD:AAC9116 | 63  | 1  |
| Crambidae       | <i>Anania verbascalis</i>           | BOLD:AAF3935 | 57  | 1  |
| Crambidae       | <i>Catoptria conchella</i>          | BOLD:AAD6893 | 18  | 1  |
| Crambidae       | <i>Catoptria europaeica</i>         | BOLD:AAI7306 | 19  | 2  |
| Crambidae       | <i>Catoptria falsella</i>           | BOLD:AAC2294 | 64  | 1  |
| Crambidae       | <i>Catoptria luctiferella</i>       | BOLD:ACF3634 | 13  | 2  |
| Crambidae       | <i>Catoptria lythargyrella</i>      | BOLD:AAQ1932 | 26  | 2  |

|           |                                |              |     |   |
|-----------|--------------------------------|--------------|-----|---|
| Crambidae | <i>Catoptria myella</i>        | BOLD:AAC2957 | 79  | 3 |
| Crambidae | <i>Catoptria mytilella</i>     | BOLD:AAF2101 | 29  | 1 |
| Crambidae | <i>Catoptria pinella</i>       | BOLD:AAC6797 | 64  | 1 |
| Crambidae | <i>Catoptria radiella</i>      | BOLD:ABY7192 | 9   | 1 |
| Crambidae | <i>Catoptria zermattensis</i>  | BOLD:AEH7893 | 4   | 1 |
| Crambidae | <i>Chrysoteuchia culmella</i>  | BOLD:AAC0540 | 83  | 1 |
| Crambidae | <i>Crambus ericella</i>        | BOLD:AAD6953 | 21  | 1 |
| Crambidae | <i>Crambus lathoniellus</i>    | BOLD:AAC1691 | 59  | 1 |
| Crambidae | <i>Crambus monochromellus</i>  | BOLD:AAA6137 | 77  | 1 |
| Crambidae | <i>Cydalima perspectalis</i>   | BOLD:AAI7349 | 60  | 1 |
| Crambidae | <i>Cynaeda dentalis</i>        | BOLD:AAE7870 | 32  | 1 |
| Crambidae | <i>Dolicharthria punctalis</i> | BOLD:AAE0194 | 32  | 1 |
| Crambidae | <i>Euchromius ocella</i>       | BOLD:AAA5671 | 249 | 2 |
| Crambidae | <i>Eudonia delunella</i>       | BOLD:AAE4545 | 39  | 1 |
| Crambidae | <i>Eudonia lacustrata</i>      | BOLD:AAB3829 | 97  | 2 |
| Crambidae | <i>Eudonia mercurella</i>      | BOLD:ABZ6210 | 27  | 2 |
| Crambidae | <i>Eudonia phaeoleuca</i>      | BOLD:AAN2754 | 8   | 3 |
| Crambidae | <i>Eudonia sudetica</i>        | BOLD:AAB9089 | 72  | 1 |
| Crambidae | <i>Eudonia truncicolella</i>   | BOLD:AAB1558 | 69  | 1 |
| Crambidae | <i>Eudonia vallesialis</i>     | BOLD:AAC3507 | 2   | 1 |
| Crambidae | <i>Evergestis aenealis</i>     | BOLD:AAE0382 | 18  | 1 |
| Crambidae | <i>Evergestis limbata</i>      | BOLD:AAD7887 | 26  | 1 |
| Crambidae | <i>Evergestis sophialis</i>    | BOLD:ABZ5619 | 7   | 1 |
| Crambidae | <i>Gesneria centuriella</i>    | BOLD:ABZ8142 | 256 | 1 |
| Crambidae | <i>Loxostege sticticalis</i>   | BOLD:AAB4167 | 146 | 1 |
| Crambidae | <i>Mecyna lutealis</i>         | BOLD:AAP9516 | 12  | 1 |
| Crambidae | <i>Metaxmeste phrygialis</i>   | BOLD:AAE7685 | 42  | 1 |
| Crambidae | <i>Metaxmeste schrankiana</i>  | BOLD:AAE7792 | 34  | 1 |
| Crambidae | <i>Nomophila noctuella</i>     | BOLD:AAA7880 | 318 | 1 |
| Crambidae | <i>Oreana alpestralis</i>      | BOLD:ABX5164 | 10  | 1 |
| Crambidae | <i>Ostrinia nubilalis</i>      | BOLD:AEJ8875 | 414 | 1 |
| Crambidae | <i>Palpita vitrealis</i>       | BOLD:AAC1043 | 100 | 1 |
| Crambidae | <i>Paracorsia repandalis</i>   | BOLD:AAK4971 | 28  | 1 |
| Crambidae | <i>Pediasia luteella</i>       | BOLD:AAL3686 | 35  | 1 |
| Crambidae | <i>Platytes alpinella</i>      | BOLD:AAE1240 | 34  | 1 |
| Crambidae | <i>Platytes cerussella</i>     | BOLD:AAF4169 | 29  | 1 |
| Crambidae | <i>Pyrausta aerealis</i>       | BOLD:AAC7368 | 28  | 1 |
| Crambidae | <i>Pyrausta despicata</i>      | BOLD:AAB9618 | 92  | 1 |
| Crambidae | <i>Pyrausta porphyralis</i>    | BOLD:AAE8423 | 19  | 1 |
| Crambidae | <i>Pyrausta virginalis</i>     | BOLD:AAI0559 | 16  | 1 |
| Crambidae | <i>Scoparia conicella</i>      | BOLD:AAD3353 | 19  | 3 |
| Crambidae | <i>Sitochroa verticalis</i>    | BOLD:AAB9443 | 136 | 2 |
| Crambidae | <i>Udea alpinalis</i>          | BOLD:ABZ3980 | 20  | 1 |
| Crambidae | <i>Udea austriacalis</i>       | BOLD:AAD2363 | 11  | 1 |
| Crambidae | <i>Udea ferrugalis</i>         | BOLD:AAC3729 | 115 | 1 |
| Crambidae | <i>Udea lutealis</i>           | BOLD:AAD5555 | 49  | 2 |
| Crambidae | <i>Udea rhododendronalis</i>   | BOLD:AAH7703 | 13  | 1 |

|                |                                  |              |     |   |
|----------------|----------------------------------|--------------|-----|---|
| Crambidae      | <i>Udea uliginosalis</i>         | BOLD:AAC7935 | 24  | 1 |
| Depressariidae | <i>Agonopterix alpigena</i>      | BOLD:AAC0206 | 726 | 1 |
| Depressariidae | <i>Agonopterix angelicella</i>   | BOLD:AAC0206 | 726 | 2 |
| Depressariidae | <i>Agonopterix arenella</i>      | BOLD:AAC6982 | 89  | 2 |
| Depressariidae | <i>Agonopterix atomella</i>      | BOLD:AAC0206 | 726 | 2 |
| Depressariidae | <i>Agonopterix ciliella</i>      | BOLD:ACF5176 | 119 | 1 |
| Depressariidae | <i>Agonopterix heracliata</i>    | BOLD:ADO3923 | 77  | 1 |
| Depressariidae | <i>Agonopterix ivinskisi</i>     | BOLD:AAC0206 | 726 | 1 |
| Depressariidae | <i>Agonopterix kaekeritziana</i> | BOLD:AAC0206 | 726 | 2 |
| Depressariidae | <i>Agonopterix liturosa</i>      | BOLD:AAE7191 | 57  | 2 |
| Depressariidae | <i>Agonopterix nervosa</i>       | BOLD:AAC1846 | 67  | 1 |
| Depressariidae | <i>Agonopterix rotundella</i>    | BOLD:AAJ6714 | 24  | 2 |
| Depressariidae | <i>Agonopterix scopariella</i>   | BOLD:AAC0206 | 726 | 1 |
| Depressariidae | <i>Agonopterix senecionis</i>    | BOLD:ABA0549 | 21  | 2 |
| Depressariidae | <i>Agonopterix silerella</i>     | BOLD:ABA0480 | 23  | 4 |
| Depressariidae | <i>Anchinia daphnella</i>        | BOLD:AAE5098 | 23  | 1 |
| Depressariidae | <i>Carcina quercana</i>          | BOLD:AAB0177 | 181 | 1 |
| Depressariidae | <i>Depressaria absynthiella</i>  | BOLD:ABA0596 | 8   | 2 |
| Depressariidae | <i>Depressaria artemisiae</i>    | BOLD:AAF8250 | 39  | 1 |
| Depressariidae | <i>Depressaria gallicella</i>    | BOLD:ABA1484 | 4   | 1 |
| Depressariidae | <i>Depressaria incognitella</i>  | BOLD:ABZ7952 | 13  | 7 |
| Depressariidae | <i>Depressaria olerella</i>      | BOLD:AAF8185 | 36  | 2 |
| Depressariidae | <i>Depressaria ululana</i>       | BOLD:ABA1417 | 12  | 6 |
| Depressariidae | <i>Ethmia bipunctella</i>        | BOLD:AAB2343 | 70  | 1 |
| Depressariidae | <i>Ethmia pusiella</i>           | BOLD:AAE4537 | 29  | 1 |
| Depressariidae | <i>Levipalpus hepatariella</i>   | BOLD:AAJ2744 | 24  | 2 |
| Depressariidae | <i>Orophia sp.</i>               | BOLD:AEA1426 | 1   | 1 |
| Drepanidae     | <i>Drepana falcataria</i>        | BOLD:AAB8918 | 49  | 1 |
| Drepanidae     | <i>Habrosyne pyritoides</i>      | BOLD:AAC5831 | 65  | 1 |
| Drepanidae     | <i>Ochropacha duplaris</i>       | BOLD:AAC6798 | 28  | 1 |
| Drepanidae     | <i>Polyploca ridens</i>          | BOLD:AAL9936 | 49  | 1 |
| Drepanidae     | <i>Tethea or</i>                 | BOLD:AAC9856 | 28  | 1 |
| Elachistidae   | <i>Elachista atricomella</i>     | BOLD:AAI9389 | 10  | 2 |
| Elachistidae   | <i>Elachista atricomella</i>     | BOLD:ABZ5157 | 34  | 1 |
| Elachistidae   | <i>Elachista collitella</i>      | BOLD:AAK9440 | 44  | 6 |
| Elachistidae   | <i>Elachista elsaella</i>        | BOLD:AAQ0950 | 59  | 7 |
| Elachistidae   | <i>Elachista freyerella</i>      | BOLD:AAD9985 | 219 | 4 |
| Elachistidae   | <i>Elachista infuscata</i>       | BOLD:ABA4188 | 11  | 7 |
| Elachistidae   | <i>Elachista juliensis</i>       | BOLD:AAP5714 | 43  | 2 |
| Elachistidae   | <i>Elachista metella</i>         | BOLD:AAV1041 | 69  | 2 |
| Elachistidae   | <i>Elachista nolckenii</i>       | BOLD:ACJ3946 | 26  | 4 |
| Elachistidae   | <i>Elachista occulta</i>         | BOLD:ADI5970 | 14  | 2 |
| Elachistidae   | <i>Elachista sp. 1</i>           | BOLD:AEM6237 | 4   | 2 |
| Elachistidae   | <i>Elachista sp. 2</i>           | BOLD:AEA3025 | 6   | 3 |
| Elachistidae   | <i>Elachista subocellea</i>      | BOLD:AAC7908 | 57  | 1 |
| Elachistidae   | <i>Elachista wieseriella</i>     | BOLD:ACG7227 | 24  | 1 |
| Epermeniidae   | <i>Epermenia aequidentellus</i>  | BOLD:AAL0665 | 22  | 1 |

|              |                               |              |      |   |
|--------------|-------------------------------|--------------|------|---|
| Epermeniidae | <i>Epermenia devotella</i>    | BOLD:ACK5477 | 4    | 1 |
| Epermeniidae | <i>Epermenia insecurellus</i> | BOLD:ACX7939 | 16   | 2 |
| Epermeniidae | <i>Epermenia pontificella</i> | BOLD:AEA3019 | 4    | 1 |
| Epermeniidae | <i>Ochromolopis ictella</i>   | BOLD:AAI3580 | 44   | 1 |
| Epermeniidae | <i>Phaulernis statariella</i> | BOLD:ABW6614 | 5    | 2 |
| Erebidae     | <i>Amata phegea</i>           | BOLD:AAM0522 | 13   | 1 |
| Erebidae     | <i>Arctia aulica</i>          | BOLD:AAF3936 | 11   | 1 |
| Erebidae     | <i>Arctia caja</i>            | BOLD:AAA8530 | 89   | 1 |
| Erebidae     | <i>Arctia plantaginis</i>     | BOLD:AAB6883 | 650  | 1 |
| Erebidae     | <i>Arctia villica</i>         | BOLD:AAC8627 | 46   | 1 |
| Erebidae     | <i>Arctornis l-nigrum</i>     | BOLD:AAD9740 | 45   | 1 |
| Erebidae     | <i>Atolmis rubricollis</i>    | BOLD:AAD2377 | 43   | 1 |
| Erebidae     | <i>Callimorpha dominula</i>   | BOLD:AAD5343 | 31   | 1 |
| Erebidae     | <i>Calliteara pudibunda</i>   | BOLD:AAB5204 | 83   | 1 |
| Erebidae     | <i>Calyptra thalictri</i>     | BOLD:AAA7764 | 91   | 1 |
| Erebidae     | <i>Catephia alchymista</i>    | BOLD:AAK2247 | 26   | 1 |
| Erebidae     | <i>Catocala fraxini</i>       | BOLD:AAC6489 | 39   | 1 |
| Erebidae     | <i>Catocala lupina</i>        | BOLD:AAE9295 | 10   | 1 |
| Erebidae     | <i>Chelis maculosa</i>        | BOLD:AAF2637 | 27   | 1 |
| Erebidae     | <i>Colobochyla salicalis</i>  | BOLD:AAD4105 | 23   | 1 |
| Erebidae     | <i>Coscinia cribraria</i>     | BOLD:AAT9511 | 4    | 1 |
| Erebidae     | <i>Cybosia mesomella</i>      | BOLD:AAD1825 | 32   | 1 |
| Erebidae     | <i>Diacrisia sannio</i>       | BOLD:AAB8660 | 52   | 1 |
| Erebidae     | <i>Diaphora sordida</i>       | BOLD:ACF8043 | 5    | 1 |
| Erebidae     | <i>Dysauxes ancilla</i>       | BOLD:AAK9768 | 12   | 1 |
| Erebidae     | <i>Eilema complana</i>        | BOLD:AAB6846 | 132  | 3 |
| Erebidae     | <i>Eilema depressa</i>        | BOLD:AAB6834 | 142  | 1 |
| Erebidae     | <i>Eilema lurideola</i>       | BOLD:AAB6833 | 73   | 1 |
| Erebidae     | <i>Eilema lutarella</i>       | BOLD:ABZ2872 | 36   | 1 |
| Erebidae     | <i>Eublemma parva</i>         | BOLD:AAM5884 | 44   | 1 |
| Erebidae     | <i>Eublemma polygramma</i>    | BOLD:AAL3781 | 14   | 1 |
| Erebidae     | <i>Eublemma purpurina</i>     | BOLD:AAE4672 | 23   | 1 |
| Erebidae     | <i>Euproctis similis</i>      | BOLD:AAC3712 | 96   | 1 |
| Erebidae     | <i>Herminia tarsicrinalis</i> | BOLD:AAC1537 | 54   | 2 |
| Erebidae     | <i>Hypena obesalis</i>        | BOLD:AAF3765 | 22   | 1 |
| Erebidae     | <i>Hypena proboscidalis</i>   | BOLD:AAB6485 | 94   | 1 |
| Erebidae     | <i>Hyphantria cunea</i>       | BOLD:AAA2435 | 255  | 1 |
| Erebidae     | <i>Leucoma salicis</i>        | BOLD:AAA5528 | 137  | 1 |
| Erebidae     | <i>Lithosia quadra</i>        | BOLD:AAB8723 | 120  | 1 |
| Erebidae     | <i>Lygephila cracca</i>       | BOLD:AAD9537 | 16   | 1 |
| Erebidae     | <i>Lygephila lusoria</i>      | BOLD:AAZ7719 | 11   | 1 |
| Erebidae     | <i>Lymantria dispar</i>       | BOLD:AAA2052 | 6270 | 1 |
| Erebidae     | <i>Lymantria monacha</i>      | BOLD:AAA5537 | 158  | 1 |
| Erebidae     | <i>Macrochilo cribrumalis</i> | BOLD:AAC6065 | 34   | 1 |
| Erebidae     | <i>Metachrostis dardouini</i> | BOLD:ACK1973 | 6    | 1 |
| Erebidae     | <i>Mitochrista miniata</i>    | BOLD:AAC4781 | 53   | 1 |
| Erebidae     | <i>Nudaria mundana</i>        | BOLD:AAD8574 | 33   | 1 |

|             |                                  |              |      |   |
|-------------|----------------------------------|--------------|------|---|
| Erebidae    | <i>Orgyia antiqua</i>            | BOLD:AAA6432 | 123  | 1 |
| Erebidae    | <i>Paracolax tristalis</i>       | BOLD:AAE6800 | 152  | 1 |
| Erebidae    | <i>Parascotia fuliginaria</i>    | BOLD:AAC4237 | 43   | 1 |
| Erebidae    | <i>Pechipogo strigilata</i>      | BOLD:AAE7062 | 42   | 2 |
| Erebidae    | <i>Pelosia muscerda</i>          | BOLD:AAD5281 | 29   | 1 |
| Erebidae    | <i>Phragmatobia fuliginosa</i>   | BOLD:AAA6178 | 95   | 1 |
| Erebidae    | <i>Polypogon tentacularia</i>    | BOLD:AAF0435 | 33   | 1 |
| Erebidae    | <i>Rivula sericealis</i>         | BOLD:ABX5628 | 22   | 1 |
| Erebidae    | <i>Schrankia costaestrigalis</i> | BOLD:AAD1543 | 72   | 1 |
| Erebidae    | <i>Setina aurita</i>             | BOLD:ABZ5368 | 20   | 3 |
| Erebidae    | <i>Spilosoma lubricipeda</i>     | BOLD:AAB2233 | 113  | 1 |
| Erebidae    | <i>Spilosoma lutea</i>           | BOLD:AAC0134 | 66   | 1 |
| Erebidae    | <i>Trisateles emortualis</i>     | BOLD:AAC2587 | 43   | 1 |
| Erebidae    | <i>Zanclognatha zelleralis</i>   | BOLD:AAJ9773 | 14   | 1 |
| Gelechiidae | <i>Acompsia cinerella</i>        | BOLD:AAD0078 | 58   | 1 |
| Gelechiidae | <i>Acompsia tripunctella</i>     | BOLD:AEA1604 | 1    | 1 |
| Gelechiidae | <i>Anarsia spartiella</i>        | BOLD:ABA2603 | 11   | 2 |
| Gelechiidae | <i>Aproaerema anthyllidella</i>  | BOLD:AAD2266 | 381  | 1 |
| Gelechiidae | <i>Aproaerema anthyllidella</i>  | BOLD:AAD2267 | 65   | 1 |
| Gelechiidae | <i>Aproaerema cinctella</i>      | BOLD:AAD7223 | 64   | 1 |
| Gelechiidae | <i>Aproaerema incognitana</i>    | BOLD:AEA2976 | 3    | 3 |
| Gelechiidae | <i>Aproaerema incognitana</i>    | BOLD:ADZ8567 | 1    | 1 |
| Gelechiidae | <i>Aproaerema patruella</i>      | BOLD:AAE2579 | 72   | 3 |
| Gelechiidae | <i>Aproaerema sangiella</i>      | BOLD:AAE8758 | 68   | 1 |
| Gelechiidae | <i>Aproaerema taeniolella</i>    | BOLD:AAE8756 | 61   | 1 |
| Gelechiidae | <i>Aproaerema vinella</i>        | BOLD:ABV9469 | 18   | 1 |
| Gelechiidae | <i>Argolamprotes micella</i>     | BOLD:AAD2506 | 23   | 1 |
| Gelechiidae | <i>Aristotelia brizella</i>      | BOLD:AAJ1682 | 25   | 1 |
| Gelechiidae | <i>Aroga flavicomella</i>        | BOLD:ADF8328 | 3    | 1 |
| Gelechiidae | <i>Athrips mouffetella</i>       | BOLD:AAC9993 | 52   | 1 |
| Gelechiidae | <i>Athrips pruinosa</i>          | BOLD:AEU9469 | 2    | 1 |
| Gelechiidae | <i>Brachmia dimidiella</i>       | BOLD:AAF6101 | 11   | 1 |
| Gelechiidae | <i>Bryotropha senectella</i>     | BOLD:AAD3661 | 149  | 3 |
| Gelechiidae | <i>Bryotropha similis</i>        | BOLD:AAA2297 | 1157 | 5 |
| Gelechiidae | <i>Carpatolechia decorella</i>   | BOLD:AAK2790 | 49   | 2 |
| Gelechiidae | <i>Carpatolechia fugitivella</i> | BOLD:AAA7652 | 109  | 1 |
| Gelechiidae | <i>Carpatolechia notatella</i>   | BOLD:AAD6612 | 45   | 1 |
| Gelechiidae | <i>Caryocolum alsinella</i>      | BOLD:ADG5831 | 5    | 1 |
| Gelechiidae | <i>Caryocolum amaurella</i>      | BOLD:AAE9473 | 6    | 1 |
| Gelechiidae | <i>Caryocolum blandelloides</i>  | BOLD:AAK2834 | 11   | 2 |
| Gelechiidae | <i>Caryocolum delphinatella</i>  | BOLD:AAK2827 | 8    | 3 |
| Gelechiidae | <i>Caryocolum interalbicella</i> | BOLD:AAI6572 | 11   | 4 |
| Gelechiidae | <i>Caryocolum lamai</i>          | BOLD:ADZ9481 | 3    | 3 |
| Gelechiidae | <i>Caryocolum mazeli</i>         | BOLD:ABY3315 | 8    | 3 |
| Gelechiidae | <i>Caryocolum messneri</i>       | BOLD:ACT3307 | 11   | 5 |
| Gelechiidae | <i>Caryocolum mucronatella</i>   | BOLD:AAW4102 | 15   | 5 |
| Gelechiidae | <i>Caryocolum petrophila</i>     | BOLD:AAO3809 | 23   | 2 |

|             |                                  |              |     |   |
|-------------|----------------------------------|--------------|-----|---|
| Gelechiidae | <i>Caryocolum repentis</i>       | BOLD:AAV7766 | 14  | 1 |
| Gelechiidae | <i>Caryocolum tischeriella</i>   | BOLD:AAI6566 | 32  | 3 |
| Gelechiidae | <i>Chionodes distinctella</i>    | BOLD:AAE9034 | 76  | 1 |
| Gelechiidae | <i>Chionodes fumatella</i>       | BOLD:AAC7811 | 47  | 1 |
| Gelechiidae | <i>Chionodes perpetuella</i>     | BOLD:AAJ4702 | 10  | 1 |
| Gelechiidae | <i>Chionodes tragicella</i>      | BOLD:AAJ0097 | 17  | 1 |
| Gelechiidae | <i>Dichomeris derasella</i>      | BOLD:AAE7499 | 33  | 1 |
| Gelechiidae | <i>Dichomeris juniperella</i>    | BOLD:AAF5665 | 15  | 1 |
| Gelechiidae | <i>Ephysteris inustella</i>      | BOLD:AEF8437 | 6   | 6 |
| Gelechiidae | <i>Ephysteris sp. 1</i>          | BOLD:ADZ8459 | 3   | 3 |
| Gelechiidae | <i>Ephysteris sp. 2</i>          | BOLD:AEA3472 | 3   | 3 |
| Gelechiidae | <i>Exoteleia dodecella</i>       | BOLD:AAA8390 | 148 | 1 |
| Gelechiidae | <i>Gelechia asinella</i>         | BOLD:AAV9300 | 6   | 1 |
| Gelechiidae | <i>Gelechia hippophaella</i>     | BOLD:AAG0519 | 13  | 1 |
| Gelechiidae | <i>Gelechia sabinella</i>        | BOLD:AAD7093 | 50  | 2 |
| Gelechiidae | <i>Gelechia scotinella</i>       | BOLD:AAI7032 | 37  | 1 |
| Gelechiidae | <i>Gelechia sororculella</i>     | BOLD:AAC8633 | 53  | 2 |
| Gelechiidae | <i>Gladiovalva rumicivorella</i> | BOLD:AAV0789 | 3   | 1 |
| Gelechiidae | <i>Gnorimoschema steueri</i>     | BOLD:AEC2802 | 5   | 4 |
| Gelechiidae | <i>Helcystogramma lutatella</i>  | BOLD:AAI6980 | 98  | 1 |
| Gelechiidae | <i>Helcystogramma rufescens</i>  | BOLD:AAC1177 | 58  | 1 |
| Gelechiidae | <i>Megacraspedus cottiensis</i>  | BOLD:AEA4020 | 3   | 3 |
| Gelechiidae | <i>Megacraspedus peslieri</i>    | BOLD:ADM8362 | 5   | 3 |
| Gelechiidae | <i>Mesophleps trinitella</i>     | BOLD:AAV7800 | 72  | 1 |
| Gelechiidae | <i>Metzneria aprilella</i>       | BOLD:AAB4322 | 20  | 2 |
| Gelechiidae | <i>Metzneria artificella</i>     | BOLD:ABW7147 | 6   | 1 |
| Gelechiidae | <i>Metzneria metzneriella</i>    | BOLD:ABW0199 | 4   | 2 |
| Gelechiidae | <i>Metzneria neuropterella</i>   | BOLD:AAH3861 | 21  | 4 |
| Gelechiidae | <i>Mirificarma maculatella</i>   | BOLD:AAH7250 | 13  | 1 |
| Gelechiidae | <i>Monochroa conspersella</i>    | BOLD:AAF3517 | 33  | 1 |
| Gelechiidae | <i>Monochroa dellabeffai</i>     | BOLD:ADR9993 | 3   | 1 |
| Gelechiidae | <i>Monochroa sperata</i>         | BOLD:AAX4741 | 7   | 3 |
| Gelechiidae | <i>Monochroa tenebrella</i>      | BOLD:AAG1078 | 21  | 1 |
| Gelechiidae | <i>Neofaculta infernella</i>     | BOLD:AAC1363 | 106 | 1 |
| Gelechiidae | <i>Neofriseria peliella</i>      | BOLD:ABZ1425 | 16  | 1 |
| Gelechiidae | <i>Neotelphusa sequax</i>        | BOLD:AAL5674 | 40  | 2 |
| Gelechiidae | <i>Nothris lemniscellus</i>      | BOLD:AAI2382 | 26  | 1 |
| Gelechiidae | <i>Nothris verbascella</i>       | BOLD:AAE5563 | 39  | 2 |
| Gelechiidae | <i>Oxypteryx atrella</i>         | BOLD:AAD5702 | 41  | 1 |
| Gelechiidae | <i>Oxypteryx libertinella</i>    | BOLD:AAB5293 | 14  | 4 |
| Gelechiidae | <i>Oxypteryx unicolorella</i>    | BOLD:AAD1198 | 56  | 1 |
| Gelechiidae | <i>Oxypteryx wilkella</i>        | BOLD:AAF7554 | 43  | 1 |
| Gelechiidae | <i>Pogochaetia solitaria</i>     | BOLD:ACA9790 | 6   | 1 |
| Gelechiidae | <i>Prolita sexpunctella</i>      | BOLD:ABZ5400 | 47  | 2 |
| Gelechiidae | <i>Prolita solutella</i>         | BOLD:AAK9355 | 30  | 1 |
| Gelechiidae | <i>Recurvaria nanella</i>        | BOLD:AAB2851 | 82  | 1 |
| Gelechiidae | <i>Sattleria izoardi</i>         | BOLD:ABV9733 | 5   | 1 |

|             |                                  |              |     |   |
|-------------|----------------------------------|--------------|-----|---|
| Gelechiidae | <i>Sattleria melaleucella</i>    | BOLD:AAC5037 | 19  | 1 |
| Gelechiidae | <i>Scrobipalpa acuminatella</i>  | BOLD:AAC1644 | 166 | 5 |
| Gelechiidae | <i>Scrobipalpa artemisiella</i>  | BOLD:AAE9838 | 53  | 1 |
| Gelechiidae | <i>Scrobipalpa atriplicella</i>  | BOLD:AAA9252 | 38  | 1 |
| Gelechiidae | <i>Scrobipalpa reiprichi</i>     | BOLD:ACX8455 | 5   | 1 |
| Gelechiidae | <i>Scrobipalpa samadensis</i>    | BOLD:AAE9840 | 35  | 3 |
| Gelechiidae | <i>Scrobipalpula psilella</i>    | BOLD:AAF1106 | 798 | 3 |
| Gelechiidae | <i>Sophronia humerella</i>       | BOLD:AAF4746 | 20  | 1 |
| Gelechiidae | <i>Sophronia illustrella</i>     | BOLD:ACZ2459 | 3   | 1 |
| Gelechiidae | <i>Sophronia semicostella</i>    | BOLD:AAF4747 | 17  | 1 |
| Gelechiidae | <i>Sophronia sicariellus</i>     | BOLD:AAJ3723 | 17  | 1 |
| Gelechiidae | <i>Stomopteryx flavipalpella</i> | BOLD:AAV8359 | 5   | 1 |
| Gelechiidae | <i>Stomopteryx pyrenaella</i>    | BOLD:AAU0792 | 10  | 4 |
| Gelechiidae | <i>Stomopteryx remissella</i>    | BOLD:AAI0050 | 53  | 1 |
| Gelechiidae | <i>Teleiodes saltuum</i>         | BOLD:AAF1120 | 22  | 2 |
| Gelechiidae | <i>Teleiodes vulgella</i>        | BOLD:AAE9855 | 60  | 1 |
| Gelechiidae | <i>Teleiopsis bagriotella</i>    | BOLD:ACE6105 | 50  | 1 |
| Gelechiidae | <i>Teleiopsis laetitia</i>       | BOLD:ABZ5926 | 12  | 1 |
| Gelechiidae | <i>Thiotricha subocellea</i>     | BOLD:AAD7105 | 33  | 2 |
| Gelechiidae | <i>Tila capsophilella</i>        | BOLD:ACL7124 | 5   | 2 |
| Gelechiidae | <i>Xystophora pulveratella</i>   | BOLD:AAE4677 | 18  | 1 |
| Geometridae | <i>Abraxas grossulariata</i>     | BOLD:ABY7773 | 20  | 1 |
| Geometridae | <i>Acasis viretata</i>           | BOLD:AAC2783 | 36  | 1 |
| Geometridae | <i>Adactylotis contaminaria</i>  | BOLD:AAC9850 | 11  | 1 |
| Geometridae | <i>Agriopsis aurantiaria</i>     | BOLD:AAC2753 | 298 | 1 |
| Geometridae | <i>Alcis repandata</i>           | BOLD:AAA8482 | 108 | 1 |
| Geometridae | <i>Angerona prunaria</i>         | BOLD:AAB7137 | 44  | 1 |
| Geometridae | <i>Anticollix sparsata</i>       | BOLD:AAC8298 | 23  | 1 |
| Geometridae | <i>Aplocera plagiata</i>         | BOLD:AAA8276 | 116 | 1 |
| Geometridae | <i>Aplocera praeformata</i>      | BOLD:AAC3875 | 36  | 1 |
| Geometridae | <i>Asthena albulata</i>          | BOLD:AAC7503 | 53  | 2 |
| Geometridae | <i>Asthena anseraria</i>         | BOLD:AAF6285 | 17  | 1 |
| Geometridae | <i>Biston betularia</i>          | BOLD:ABY9367 | 288 | 1 |
| Geometridae | <i>Bupalus piniaria</i>          | BOLD:AAC7293 | 54  | 1 |
| Geometridae | <i>Cabera exanthemata</i>        | BOLD:AAA6653 | 249 | 1 |
| Geometridae | <i>Cabera pusaria</i>            | BOLD:AAA9589 | 105 | 1 |
| Geometridae | <i>Campaea margaritaria</i>      | BOLD:AAB5336 | 120 | 1 |
| Geometridae | <i>Carsia lythoxylata</i>        | BOLD:AAW4070 | 3   | 1 |
| Geometridae | <i>Catarhoe cuculata</i>         | BOLD:AAC2047 | 55  | 1 |
| Geometridae | <i>Cepphis advenaria</i>         | BOLD:AAC7380 | 31  | 1 |
| Geometridae | <i>Charissa ambiguata</i>        | BOLD:ACE4202 | 69  | 1 |
| Geometridae | <i>Charissa glaucinaria</i>      | BOLD:AAC1853 | 52  | 4 |
| Geometridae | <i>Charissa obscurata</i>        | BOLD:ACE8297 | 45  | 1 |
| Geometridae | <i>Charissa pullata</i>          | BOLD:AAC7656 | 25  | 2 |
| Geometridae | <i>Charissa variegata</i>        | BOLD:AAC1039 | 35  | 1 |
| Geometridae | <i>Chiasmia clathrata</i>        | BOLD:AAB0547 | 76  | 1 |
| Geometridae | <i>Chloroclysta miata</i>        | BOLD:AAA9515 | 153 | 1 |



|             |                                |              |     |   |
|-------------|--------------------------------|--------------|-----|---|
| Geometridae | <i>Chloroclysta siterata</i>   | BOLD:AAA9515 | 153 | 1 |
| Geometridae | <i>Chloroclystis v-ata</i>     | BOLD:AAB1832 | 75  | 1 |
| Geometridae | <i>Cleora cinctaria</i>        | BOLD:AAC4786 | 34  | 1 |
| Geometridae | <i>Coenotephria salicata</i>   | BOLD:AAB9029 | 42  | 1 |
| Geometridae | <i>Coenotephria tophaceata</i> | BOLD:AAE8902 | 21  | 3 |
| Geometridae | <i>Colostygia aptata</i>       | BOLD:AAB9512 | 51  | 1 |
| Geometridae | <i>Colostygia aqueata</i>      | BOLD:AAD3617 | 49  | 2 |
| Geometridae | <i>Colostygia kollariaria</i>  | BOLD:AAE1709 | 18  | 1 |
| Geometridae | <i>Colostygia laetaria</i>     | BOLD:AAI9138 | 8   | 1 |
| Geometridae | <i>Colostygia olivata</i>      | BOLD:ACT4559 | 5   | 1 |
| Geometridae | <i>Colostygia turbata</i>      | BOLD:AAC0785 | 25  | 1 |
| Geometridae | <i>Colotois pennaria</i>       | BOLD:AAB0886 | 54  | 1 |
| Geometridae | <i>Comibaena bajularia</i>     | BOLD:AAC3677 | 40  | 2 |
| Geometridae | <i>Cosmorhoe ocellata</i>      | BOLD:AAB4250 | 69  | 1 |
| Geometridae | <i>Crocallis elinguaris</i>    | BOLD:AAB0677 | 110 | 1 |
| Geometridae | <i>Crocota tinctaria</i>       | BOLD:ABY8927 | 3   | 2 |
| Geometridae | <i>Cyclophora pupillaria</i>   | BOLD:AAB2523 | 60  | 1 |
| Geometridae | <i>Dysstroma citrata</i>       | BOLD:AE2236  | 57  | 1 |
| Geometridae | <i>Dysstroma truncata</i>      | BOLD:AAA3843 | 102 | 1 |
| Geometridae | <i>Earophila badiata</i>       | BOLD:AAC3576 | 41  | 1 |
| Geometridae | <i>Ecliptopera silaceata</i>   | BOLD:AAA2586 | 239 | 1 |
| Geometridae | <i>Ectropis crepuscularia</i>  | BOLD:ACE6053 | 70  | 1 |
| Geometridae | <i>Elophos caelibaria</i>      | BOLD:AAC5403 | 36  | 2 |
| Geometridae | <i>Elophos dilucidaria</i>     | BOLD:AAC9509 | 29  | 2 |
| Geometridae | <i>Elophos sproengertsi</i>    | BOLD:AAK9535 | 5   | 2 |
| Geometridae | <i>Elophos vittarius</i>       | BOLD:AAD3010 | 23  | 1 |
| Geometridae | <i>Emmiltis pygmaearia</i>     | BOLD:AAM0343 | 8   | 1 |
| Geometridae | <i>Ennomos quercinaria</i>     | BOLD:ACF2529 | 182 | 1 |
| Geometridae | <i>Entephria caesiata</i>      | BOLD:AAB9028 | 69  | 1 |
| Geometridae | <i>Entephria contestata</i>    | BOLD:AAJ0723 | 6   | 3 |
| Geometridae | <i>Entephria cyanata</i>       | BOLD:AAF0051 | 24  | 1 |
| Geometridae | <i>Entephria flavicinctata</i> | BOLD:AAC5436 | 38  | 1 |
| Geometridae | <i>Entephria infidaria</i>     | BOLD:AAJ0722 | 14  | 2 |
| Geometridae | <i>Entephria nobiliaria</i>    | BOLD:AAB5559 | 35  | 3 |
| Geometridae | <i>Epilobophora sabinata</i>   | BOLD:AAJ0599 | 15  | 1 |
| Geometridae | <i>Epione repandaria</i>       | BOLD:AAC2597 | 38  | 1 |
| Geometridae | <i>Epirrhoe alternata</i>      | BOLD:ACE4142 | 134 | 1 |
| Geometridae | <i>Epirrhoe galiata</i>        | BOLD:AAB2097 | 52  | 1 |
| Geometridae | <i>Epirrhoe molluginata</i>    | BOLD:AAC6771 | 36  | 1 |
| Geometridae | <i>Epirrhoe pupillata</i>      | BOLD:AAB3708 | 31  | 1 |
| Geometridae | <i>Epirrhoe rivata</i>         | BOLD:AAD7207 | 24  | 2 |
| Geometridae | <i>Epirrhoe tristata</i>       | BOLD:AAD7202 | 46  | 3 |
| Geometridae | <i>Epirrita autumnata</i>      | BOLD:AAA5906 | 40  | 1 |
| Geometridae | <i>Epirrita christyi</i>       | BOLD:AAB0936 | 212 | 2 |
| Geometridae | <i>Epirrita dilutata</i>       | BOLD:ABZ1400 | 75  | 1 |
| Geometridae | <i>Erannis defoliaria</i>      | BOLD:AAB4418 | 184 | 1 |
| Geometridae | <i>Euchoeca nebulata</i>       | BOLD:AAD0146 | 30  | 1 |

|             |                                 |              |     |   |
|-------------|---------------------------------|--------------|-----|---|
| Geometridae | <i>Eulithis populata</i>        | BOLD:ABZ1837 | 59  | 2 |
| Geometridae | <i>Eulithis prunata</i>         | BOLD:AAC1579 | 55  | 2 |
| Geometridae | <i>Euphyia frustata</i>         | BOLD:AAC5435 | 9   | 1 |
| Geometridae | <i>Eupithecia abbreviata</i>    | BOLD:AAB6529 | 117 | 1 |
| Geometridae | <i>Eupithecia abietaria</i>     | BOLD:AAD1084 | 42  | 1 |
| Geometridae | <i>Eupithecia absinthiata</i>   | BOLD:ACE4737 | 78  | 1 |
| Geometridae | <i>Eupithecia alliaria</i>      | BOLD:AAD8302 | 14  | 2 |
| Geometridae | <i>Eupithecia assimilata</i>    | BOLD:ACF3612 | 64  | 2 |
| Geometridae | <i>Eupithecia carpophagata</i>  | BOLD:AAJ0167 | 8   | 1 |
| Geometridae | <i>Eupithecia cretaceata</i>    | BOLD:AAA2084 | 10  | 1 |
| Geometridae | <i>Eupithecia denotata</i>      | BOLD:AAD1135 | 39  | 1 |
| Geometridae | <i>Eupithecia dissertata</i>    | BOLD:AAJ0095 | 17  | 9 |
| Geometridae | <i>Eupithecia distinctaria</i>  | BOLD:AAC2048 | 53  | 3 |
| Geometridae | <i>Eupithecia extraversaria</i> | BOLD:AAE4503 | 17  | 1 |
| Geometridae | <i>Eupithecia gemellata</i>     | BOLD:AAC9937 | 23  | 1 |
| Geometridae | <i>Eupithecia haworthiata</i>   | BOLD:ABZ6426 | 43  | 2 |
| Geometridae | <i>Eupithecia icterata</i>      | BOLD:ACE7877 | 14  | 2 |
| Geometridae | <i>Eupithecia icterata</i>      | BOLD:ACE7878 | 14  | 1 |
| Geometridae | <i>Eupithecia impurata</i>      | BOLD:ACE9966 | 24  | 8 |
| Geometridae | <i>Eupithecia indigata</i>      | BOLD:AAD4847 | 43  | 1 |
| Geometridae | <i>Eupithecia lariciata</i>     | BOLD:AAA4421 | 47  | 4 |
| Geometridae | <i>Eupithecia ochridata</i>     | BOLD:ABX6043 | 104 | 2 |
| Geometridae | <i>Eupithecia pimpinellata</i>  | BOLD:AAD1134 | 37  | 4 |
| Geometridae | <i>Eupithecia plumbeolata</i>   | BOLD:AAB8937 | 34  | 2 |
| Geometridae | <i>Eupithecia pusillata</i>     | BOLD:ABZ6329 | 71  | 7 |
| Geometridae | <i>Eupithecia pyreneata</i>     | BOLD:AAB8313 | 51  | 2 |
| Geometridae | <i>Eupithecia sp.</i>           | BOLD:AEC3281 | 6   | 6 |
| Geometridae | <i>Eupithecia subfuscata</i>    | BOLD:ACE8007 | 142 | 5 |
| Geometridae | <i>Eupithecia subumbrata</i>    | BOLD:AAC9951 | 44  | 2 |
| Geometridae | <i>Eupithecia tantillaria</i>   | BOLD:AAB3785 | 85  | 1 |
| Geometridae | <i>Eupithecia tenuiata</i>      | BOLD:AAC7394 | 39  | 1 |
| Geometridae | <i>Eupithecia undata</i>        | BOLD:AAF6896 | 26  | 1 |
| Geometridae | <i>Eupithecia venosata</i>      | BOLD:AAC2038 | 37  | 1 |
| Geometridae | <i>Eupithecia veratraria</i>    | BOLD:AAC9950 | 40  | 2 |
| Geometridae | <i>Eupithecia vulgata</i>       | BOLD:AAA8708 | 95  | 5 |
| Geometridae | <i>Fagivorina arenaria</i>      | BOLD:AAD7665 | 22  | 1 |
| Geometridae | <i>Gandaritis pyraliata</i>     | BOLD:AAB5983 | 56  | 2 |
| Geometridae | <i>Psodos sp.</i>               | BOLD:AAE6737 | 2   | 1 |
| Geometridae | <i>Gnophos fuvata</i>           | BOLD:AAC6119 | 21  | 1 |
| Geometridae | <i>Gnophos obfuscata</i>        | BOLD:AAB8517 | 8   | 1 |
| Geometridae | <i>Gymnoscelis rufifasciata</i> | BOLD:AAA7404 | 98  | 1 |
| Geometridae | <i>Hemithea aestivaria</i>      | BOLD:AAA4522 | 130 | 1 |
| Geometridae | <i>Horisme aemulata</i>         | BOLD:AAF1147 | 24  | 2 |
| Geometridae | <i>Horisme calligraphata</i>    | BOLD:AAE5006 | 15  | 1 |
| Geometridae | <i>Horisme tersata</i>          | BOLD:AAC5135 | 71  | 3 |
| Geometridae | <i>Hydrelia flammeolaria</i>    | BOLD:ACE6107 | 30  | 1 |
| Geometridae | <i>Hydria cervicalis</i>        | BOLD:AAC1414 | 39  | 1 |

|             |                                 |              |     |   |
|-------------|---------------------------------|--------------|-----|---|
| Geometridae | <i>Hydria montivagata</i>       | BOLD:AAE7422 | 29  | 2 |
| Geometridae | <i>Hydria undulata</i>          | BOLD:AAA9056 | 86  | 1 |
| Geometridae | <i>Hydriomena furcata</i>       | BOLD:ACE8706 | 83  | 1 |
| Geometridae | <i>Hydriomena ruberata</i>      | BOLD:AAB6494 | 31  | 1 |
| Geometridae | <i>Hylaea fasciaria</i>         | BOLD:AAB6675 | 85  | 1 |
| Geometridae | <i>Hypomecis roboraria</i>      | BOLD:AAC9905 | 53  | 2 |
| Geometridae | <i>Idaea aureolaria</i>         | BOLD:AAE6012 | 19  | 1 |
| Geometridae | <i>Idaea aversata</i>           | BOLD:AAA8256 | 113 | 1 |
| Geometridae | <i>Idaea biselata</i>           | BOLD:AAB2239 | 97  | 1 |
| Geometridae | <i>Idaea calunetaria</i>        | BOLD:AEC2124 | 3   | 3 |
| Geometridae | <i>Idaea contiguaria</i>        | BOLD:AAP5642 | 17  | 2 |
| Geometridae | <i>Idaea degeneraria</i>        | BOLD:AAB2099 | 82  | 1 |
| Geometridae | <i>Idaea deversaria</i>         | BOLD:AAA9359 | 45  | 1 |
| Geometridae | <i>Idaea dilutaria</i>          | BOLD:AAD0840 | 29  | 2 |
| Geometridae | <i>Idaea flaveolaria</i>        | BOLD:AAF3049 | 10  | 2 |
| Geometridae | <i>Idaea humiliata</i>          | BOLD:ACF2945 | 30  | 1 |
| Geometridae | <i>Idaea moniliata</i>          | BOLD:AAC7660 | 22  | 1 |
| Geometridae | <i>Idaea seriata</i>            | BOLD:ACF4900 | 26  | 1 |
| Geometridae | <i>Idaea straminata</i>         | BOLD:AAA8258 | 68  | 1 |
| Geometridae | <i>Idaea typicata</i>           | BOLD:AAF3045 | 12  | 1 |
| Geometridae | <i>Lampropteryx suffumata</i>   | BOLD:AAB2819 | 5   | 1 |
| Geometridae | <i>Lomaspilis marginata</i>     | BOLD:AAB5300 | 90  | 1 |
| Geometridae | <i>Lomographa bimaculata</i>    | BOLD:AAB9407 | 43  | 1 |
| Geometridae | <i>Lomographa temerata</i>      | BOLD:AAB5203 | 48  | 1 |
| Geometridae | <i>Lycia hirtaria</i>           | BOLD:AEE3727 | 82  | 1 |
| Geometridae | <i>Lythria plumularia</i>       | BOLD:AAM0981 | 8   | 1 |
| Geometridae | <i>Macaria alternata</i>        | BOLD:AAA1496 | 78  | 1 |
| Geometridae | <i>Macaria liturata</i>         | BOLD:ACF4721 | 13  | 1 |
| Geometridae | <i>Macaria lturata</i>          | BOLD:ACF0383 | 51  | 1 |
| Geometridae | <i>Macaria wauaria</i>          | BOLD:AAC9595 | 39  | 1 |
| Geometridae | <i>Martania taeniata</i>        | BOLD:AAE9770 | 32  | 1 |
| Geometridae | <i>Mesoleuca albicillata</i>    | BOLD:AAC8744 | 28  | 1 |
| Geometridae | <i>Mesotype didymata</i>        | BOLD:AAE3950 | 46  | 1 |
| Geometridae | <i>Minoa murinata</i>           | BOLD:AAF5756 | 23  | 1 |
| Geometridae | <i>Nebula achromaria</i>        | BOLD:AAG2005 | 22  | 1 |
| Geometridae | <i>Nebula nebulata</i>          | BOLD:AAC6528 | 41  | 3 |
| Geometridae | <i>Nycterosea obstipata</i>     | BOLD:AAA3431 | 61  | 1 |
| Geometridae | <i>Odezia atrata</i>            | BOLD:AEC3295 | 1   | 1 |
| Geometridae | <i>Odontopera bidentata</i>     | BOLD:AAB6560 | 118 | 1 |
| Geometridae | <i>Operophtera fagata</i>       | BOLD:AAD0141 | 271 | 1 |
| Geometridae | <i>Opisthograptis luteolata</i> | BOLD:AAA9865 | 96  | 1 |
| Geometridae | <i>Ourapteryx sambucaria</i>    | BOLD:AAB4472 | 48  | 1 |
| Geometridae | <i>Pareulype berberata</i>      | BOLD:AAD4122 | 29  | 1 |
| Geometridae | <i>Pasiphila rectangulata</i>   | BOLD:AAA3075 | 232 | 2 |
| Geometridae | <i>Pennithera firmata</i>       | BOLD:AAC6743 | 64  | 2 |
| Geometridae | <i>Perconia strigillaria</i>    | BOLD:AAD6401 | 12  | 1 |
| Geometridae | <i>Perigune convergata</i>      | BOLD:ABA9646 | 3   | 1 |

|             |                                 |              |     |   |
|-------------|---------------------------------|--------------|-----|---|
| Geometridae | <i>Perizoma affinitata</i>      | BOLD:AAC0743 | 65  | 1 |
| Geometridae | <i>Perizoma albulata</i>        | BOLD:AAC2706 | 44  | 1 |
| Geometridae | <i>Perizoma alchemillata</i>    | BOLD:AAA9313 | 116 | 2 |
| Geometridae | <i>Perizoma barrassoi</i>       | BOLD:ACJ5976 | 8   | 1 |
| Geometridae | <i>Perizoma blandiata</i>       | BOLD:AAC6889 | 29  | 1 |
| Geometridae | <i>Perizoma hydrata</i>         | BOLD:AAC0743 | 65  | 1 |
| Geometridae | <i>Perizoma incultaria</i>      | BOLD:AAF5044 | 22  | 1 |
| Geometridae | <i>Perizoma juracolaria</i>     | BOLD:AAD4226 | 18  | 1 |
| Geometridae | <i>Perizoma minorata</i>        | BOLD:AAD4210 | 41  | 1 |
| Geometridae | <i>Perizoma obsoletata</i>      | BOLD:AAD4225 | 26  | 1 |
| Geometridae | <i>Philereme vetulata</i>       | BOLD:AAD2984 | 27  | 1 |
| Geometridae | <i>Plagodis pulveraria</i>      | BOLD:AAA6014 | 46  | 1 |
| Geometridae | <i>Pseudopanthera macularia</i> | BOLD:AAC7055 | 30  | 1 |
| Geometridae | <i>Rheumaptera hastata</i>      | BOLD:AAA5435 | 239 | 1 |
| Geometridae | <i>Rhodometra sacraria</i>      | BOLD:AAA8983 | 141 | 1 |
| Geometridae | <i>Rhodostrophia vibicaria</i>  | BOLD:AAB6658 | 51  | 1 |
| Geometridae | <i>Sciadia unicoloraria</i>     | BOLD:ACE3562 | 15  | 2 |
| Geometridae | <i>Scopula floslactata</i>      | BOLD:AAC5048 | 42  | 1 |
| Geometridae | <i>Scopula imitaria</i>         | BOLD:AAB6665 | 56  | 1 |
| Geometridae | <i>Scopula immorata</i>         | BOLD:AAC9960 | 40  | 1 |
| Geometridae | <i>Scopula immutata</i>         | BOLD:AAC7473 | 39  | 1 |
| Geometridae | <i>Scopula incanata</i>         | BOLD:ACF0740 | 6   | 1 |
| Geometridae | <i>Scopula nigropunctata</i>    | BOLD:AAA9023 | 44  | 1 |
| Geometridae | <i>Scopula ornata</i>           | BOLD:AAB1550 | 49  | 1 |
| Geometridae | <i>Scotopteryx bipunctaria</i>  | BOLD:AAC0078 | 48  | 2 |
| Geometridae | <i>Scotopteryx chenopodiata</i> | BOLD:AAB5023 | 69  | 1 |
| Geometridae | <i>Scotopteryx luridata</i>     | BOLD:AAC7023 | 38  | 1 |
| Geometridae | <i>Selenia dentaria</i>         | BOLD:AAB7343 | 58  | 1 |
| Geometridae | <i>Selenia lunularia</i>        | BOLD:AAB1585 | 28  | 1 |
| Geometridae | <i>Selenia tetralunaria</i>     | BOLD:AAB7329 | 52  | 1 |
| Geometridae | <i>Selidosema brunnearia</i>    | BOLD:ACE5955 | 21  | 1 |
| Geometridae | <i>Siona lineata</i>            | BOLD:AAC1903 | 47  | 1 |
| Geometridae | <i>Thera britannica</i>         | BOLD:AAA7522 | 202 | 2 |
| Geometridae | <i>Thera cognata</i>            | BOLD:AAB9686 | 79  | 1 |
| Geometridae | <i>Thera juniperata</i>         | BOLD:AAA3914 | 132 | 1 |
| Geometridae | <i>Thera obeliscata</i>         | BOLD:AAA7522 | 202 | 4 |
| Geometridae | <i>Thera variata</i>            | BOLD:AAA7522 | 202 | 1 |
| Geometridae | <i>Thera vetustata</i>          | BOLD:AAA7522 | 202 | 1 |
| Geometridae | <i>Thetidia smaragdaria</i>     | BOLD:AAB5663 | 46  | 1 |
| Geometridae | <i>Timandra comae</i>           | BOLD:AAB0828 | 128 | 1 |
| Geometridae | <i>Triphosa dubitata</i>        | BOLD:AAD3995 | 63  | 1 |
| Geometridae | <i>Triphosa sabaudiata</i>      | BOLD:AAD3970 | 34  | 1 |
| Geometridae | <i>Triphosa tauteli</i>         | BOLD:AAH8237 | 14  | 2 |
| Geometridae | <i>Venusia cambrica</i>         | BOLD:AAA1586 | 24  | 1 |
| Geometridae | <i>Xanthorhoe decoloraria</i>   | BOLD:AAA5318 | 193 | 1 |
| Geometridae | <i>Xanthorhoe designata</i>     | BOLD:ABZ0894 | 52  | 1 |
| Geometridae | <i>Xanthorhoe fluctuata</i>     | BOLD:AAA6836 | 119 | 1 |

|                  |                                      |              |      |   |
|------------------|--------------------------------------|--------------|------|---|
| Geometridae      | <i>Xanthorhoe incursata</i>          | BOLD:AAB5059 | 102  | 2 |
| Geometridae      | <i>Xanthorhoe montanata</i>          | BOLD:AAB2524 | 93   | 1 |
| Geometridae      | <i>Xanthorhoe spadicearia</i>        | BOLD:AAB7980 | 91   | 1 |
| Geometridae      | <i>Yezognophos serotinaria</i>       | BOLD:AAX7664 | 21   | 2 |
| Glyphipterigidae | <i>Glyphipterix equitella</i>        | BOLD:ABY3946 | 5    | 1 |
| Glyphipterigidae | <i>Glyphipterix gianelliella</i>     | BOLD:AAL3603 | 8    | 1 |
| Glyphipterigidae | <i>Glyphipterix simpliciella</i>     | BOLD:AAD6513 | 497  | 2 |
| Glyphipterigidae | <i>Glyphipterix thrasonella</i>      | BOLD:AAD6735 | 21   | 1 |
| Gracillariidae   | <i>Caloptilia alchimiella</i>        | BOLD:AAD2588 | 42   | 1 |
| Gracillariidae   | <i>Caloptilia betulicola</i>         | BOLD:AAE3420 | 46   | 1 |
| Gracillariidae   | <i>Caloptilia rufipennella</i>       | BOLD:AAE3419 | 78   | 3 |
| Gracillariidae   | <i>Caloptilia stigmatella</i>        | BOLD:AAA9984 | 102  | 1 |
| Gracillariidae   | <i>Calybites phasianipennella</i>    | BOLD:AAD6298 | 31   | 1 |
| Gracillariidae   | <i>Cameraria ohridella</i>           | BOLD:AAA1236 | 2229 | 1 |
| Gracillariidae   | <i>Euspilapteryx auroguttella</i>    | BOLD:AAD7434 | 78   | 1 |
| Gracillariidae   | <i>Gracillaria syringella</i>        | BOLD:AAC0054 | 140  | 1 |
| Gracillariidae   | <i>Mercantouria neli</i>             | BOLD:ACA9784 | 6    | 2 |
| Gracillariidae   | <i>Ornixola caudulatella</i>         | BOLD:AAK5430 | 8    | 1 |
| Gracillariidae   | <i>Parornix alpicola</i>             | BOLD:AAL3862 | 9    | 2 |
| Gracillariidae   | <i>Parornix anglicella</i>           | BOLD:AAL3861 | 18   | 1 |
| Gracillariidae   | <i>Parornix devoniella</i>           | BOLD:AAD1352 | 62   | 2 |
| Gracillariidae   | <i>Phyllocnistis saligna</i>         | BOLD:AAQ1589 | 33   | 1 |
| Gracillariidae   | <i>Phyllonorycter cerasicolella</i>  | BOLD:AAE6560 | 68   | 1 |
| Gracillariidae   | <i>Phyllonorycter coryli</i>         | BOLD:AAD8123 | 52   | 1 |
| Gracillariidae   | <i>Phyllonorycter corylifoliella</i> | BOLD:AAA9517 | 31   | 1 |
| Gracillariidae   | <i>Phyllonorycter geniculella</i>    | BOLD:AAH8499 | 30   | 2 |
| Gracillariidae   | <i>Phyllonorycter hilaella</i>       | BOLD:AAE0033 | 82   | 2 |
| Gracillariidae   | <i>Phyllonorycter issikii</i>        | BOLD:AAC9940 | 342  | 1 |
| Gracillariidae   | <i>Phyllonorycter mespilella</i>     | BOLD:AAC1755 | 51   | 1 |
| Gracillariidae   | <i>Phyllonorycter messaniella</i>    | BOLD:AAD9588 | 53   | 2 |
| Gracillariidae   | <i>Phyllonorycter quercifoliella</i> | BOLD:AAD8332 | 93   | 1 |
| Gracillariidae   | <i>Sabulopteryx limosella</i>        | BOLD:AAJ9158 | 32   | 1 |
| Hepialidae       | <i>Korscheltellus fusconebulosa</i>  | BOLD:AAF2520 | 46   | 1 |
| Hepialidae       | <i>Triodia sylvina</i>               | BOLD:AAD0500 | 88   | 1 |
| Hesperiidae      | <i>Carcharodus floccifera</i>        | BOLD:AAC3322 | 105  | 1 |
| Hesperiidae      | <i>Hesperia comma</i>                | BOLD:ABX6141 | 166  | 1 |
| Hesperiidae      | <i>Ochlodes sylvanus</i>             | BOLD:AAB4864 | 216  | 1 |
| Hesperiidae      | <i>Pyrgus alveus</i>                 | BOLD:ABZ6967 | 344  | 2 |
| Hesperiidae      | <i>Pyrgus carthami</i>               | BOLD:ABY6108 | 68   | 1 |
| Hesperiidae      | <i>Pyrgus malvoides</i>              | BOLD:AAB6141 | 222  | 1 |
| Hesperiidae      | <i>Pyrgus serratulae</i>             | BOLD:AAB7639 | 90   | 2 |
| Hesperiidae      | <i>Spialia sertorius</i>             | BOLD:AAC4588 | 207  | 2 |
| Hesperiidae      | <i>Thymelicus lineola</i>            | BOLD:AAA6759 | 273  | 1 |
| Hesperiidae      | <i>Thymelicus sylvestris</i>         | BOLD:AAA6761 | 138  | 2 |
| Lasiocampidae    | <i>Lasiocampa quercus</i>            | BOLD:AAC5660 | 47   | 1 |
| Lasiocampidae    | <i>Lasiocampa trifolii</i>           | BOLD:ACE7123 | 9    | 1 |
| Lasiocampidae    | <i>Macrothylacia rubi</i>            | BOLD:AAD0839 | 49   | 1 |

|                 |                                 |              |     |   |
|-----------------|---------------------------------|--------------|-----|---|
| Lasiocampidae   | <i>Malacosoma castrense</i>     | BOLD:AAK7339 | 48  | 1 |
| Lasiocampidae   | <i>Malacosoma neustria</i>      | BOLD:AAD1119 | 89  | 1 |
| Lasiocampidae   | <i>Phyllodesma tremulifolia</i> | BOLD:ACF2447 | 97  | 1 |
| Lasiocampidae   | <i>Poecilocampa alpina</i>      | BOLD:AAC8994 | 82  | 1 |
| Lasiocampidae   | <i>Poecilocampa colucheii</i>   | BOLD:AAC8994 | 82  | 1 |
| Lycaenidae      | <i>Agriades glandon</i>         | BOLD:AAA5321 | 317 | 1 |
| Lycaenidae      | <i>Agriades orbitulus</i>       | BOLD:AAE5039 | 68  | 1 |
| Lycaenidae      | <i>Aricia artaxerxes</i>        | BOLD:ACE7893 | 334 | 2 |
| Lycaenidae      | <i>Celastrina argiolus</i>      | BOLD:AAA7663 | 279 | 1 |
| Lycaenidae      | <i>Cupido minimus</i>           | BOLD:AAA9082 | 272 | 1 |
| Lycaenidae      | <i>Cyaniris semiargus</i>       | BOLD:AAB3027 | 189 | 1 |
| Lycaenidae      | <i>Eumedonia eumedon</i>        | BOLD:AAC3364 | 187 | 1 |
| Lycaenidae      | <i>Lycaena alciphron</i>        | BOLD:AAB3306 | 100 | 1 |
| Lycaenidae      | <i>Lycaena hippothoe</i>        | BOLD:AAB8947 | 115 | 1 |
| Lycaenidae      | <i>Lycaena phlaeas</i>          | BOLD:AAA5867 | 354 | 1 |
| Lycaenidae      | <i>Lycaena tityrus</i>          | BOLD:AAB1728 | 147 | 1 |
| Lycaenidae      | <i>Lycaena virgaureae</i>       | BOLD:AAB4984 | 105 | 1 |
| Lycaenidae      | <i>Lysandra bellargus</i>       | BOLD:AAA3305 | 468 | 1 |
| Lycaenidae      | <i>Lysandra coridon</i>         | BOLD:AAA3305 | 468 | 1 |
| Lycaenidae      | <i>Plebejus argus</i>           | BOLD:ABZ1727 | 350 | 1 |
| Lycaenidae      | <i>Plebejus idas</i>            | BOLD:AAA3628 | 683 | 1 |
| Lycaenidae      | <i>Polyommatus damon</i>        | BOLD:AAC1666 | 92  | 1 |
| Lycaenidae      | <i>Polyommatus dorylas</i>      | BOLD:ABX5016 | 104 | 1 |
| Lycaenidae      | <i>Polyommatus eros</i>         | BOLD:AAA3303 | 987 | 1 |
| Lycaenidae      | <i>Polyommatus escheri</i>      | BOLD:ABZ4903 | 45  | 1 |
| Lycaenidae      | <i>Polyommatus icarus</i>       | BOLD:AAA3303 | 987 | 1 |
| Lycaenidae      | <i>Satyrrium spini</i>          | BOLD:AAB3187 | 71  | 1 |
| Lycaenidae      | <i>Thecla betulae</i>           | BOLD:AAB5999 | 70  | 1 |
| Lypusidae       | <i>Agnoea josephinae</i>        | BOLD:AAC3200 | 72  | 1 |
| Lypusidae       | <i>Agnoea langohri</i>          | BOLD:ADI8825 | 6   | 5 |
| Lypusidae       | <i>Agnoea langohri</i>          | BOLD:AEH1123 | 3   | 1 |
| Lypusidae       | <i>Diurnea lipsiella</i>        | BOLD:AAD9970 | 59  | 1 |
| Micropterigidae | <i>Micropterix aruncella</i>    | BOLD:AAD9347 | 29  | 1 |
| Micropterigidae | <i>Micropterix schaefferi</i>   | BOLD:AAF7082 | 19  | 2 |
| Momphidae       | <i>Mompha conturbatella</i>     | BOLD:AAB7570 | 80  | 2 |
| Momphidae       | <i>Mompha lacteella</i>         | BOLD:AAB9184 | 32  | 1 |
| Momphidae       | <i>Mompha miscella</i>          | BOLD:AAC9730 | 21  | 1 |
| Nepticulidae    | <i>Ectoedemia albifasciella</i> | BOLD:AAB4064 | 89  | 1 |
| Nepticulidae    | <i>Ectoedemia klimeschi</i>     | BOLD:ABX4998 | 12  | 1 |
| Nepticulidae    | <i>Ectoedemia sp.</i>           | BOLD:AEB0907 | 6   | 1 |
| Nepticulidae    | <i>Stigmella floslactella</i>   | BOLD:AAF3363 | 32  | 3 |
| Nepticulidae    | <i>Stigmella hemargyrella</i>   | BOLD:AAV6973 | 76  | 1 |
| Nepticulidae    | <i>Stigmella hybnerella</i>     | BOLD:AAJ4193 | 73  | 1 |
| Nepticulidae    | <i>Trifurcula orientella</i>    | BOLD:ADQ7627 | 2   | 1 |
| Noctuidae       | <i>Abrostola asclepiadis</i>    | BOLD:AAD4547 | 48  | 1 |
| Noctuidae       | <i>Abrostola tripartita</i>     | BOLD:AAB6066 | 75  | 2 |
| Noctuidae       | <i>Acronicta alni</i>           | BOLD:AAC3196 | 54  | 1 |

|           |                               |              |     |   |
|-----------|-------------------------------|--------------|-----|---|
| Noctuidae | <i>Acronicta auricoma</i>     | BOLD:ACF2281 | 39  | 1 |
| Noctuidae | <i>Acronicta euphorbiae</i>   | BOLD:AAC6993 | 57  | 1 |
| Noctuidae | <i>Acronicta psi</i>          | BOLD:AAB3300 | 121 | 1 |
| Noctuidae | <i>Actinotia radiosia</i>     | BOLD:AAJ5662 | 7   | 1 |
| Noctuidae | <i>Aedia leucomelas</i>       | BOLD:AAC1283 | 28  | 1 |
| Noctuidae | <i>Agrochola circellaris</i>  | BOLD:AAC7613 | 58  | 1 |
| Noctuidae | <i>Agrochola litura</i>       | BOLD:AAC8167 | 43  | 2 |
| Noctuidae | <i>Agrochola macilenta</i>    | BOLD:AAC1555 | 58  | 2 |
| Noctuidae | <i>Agrochola nitida</i>       | BOLD:AAJ1527 | 37  | 1 |
| Noctuidae | <i>Agrotis cinerea</i>        | BOLD:ACE6919 | 38  | 2 |
| Noctuidae | <i>Agrotis clavis</i>         | BOLD:AAC2793 | 58  | 1 |
| Noctuidae | <i>Agrotis exclamationis</i>  | BOLD:AAB9113 | 92  | 1 |
| Noctuidae | <i>Agrotis ipsilon</i>        | BOLD:AAA3364 | 340 | 1 |
| Noctuidae | <i>Agrotis segetum</i>        | BOLD:AAC3884 | 184 | 1 |
| Noctuidae | <i>Agrotis simplonia</i>      | BOLD:ABZ7031 | 22  | 1 |
| Noctuidae | <i>Agrotis trux</i>           | BOLD:AET6511 | 5   | 1 |
| Noctuidae | <i>Allophytes oxyacanthae</i> | BOLD:AAC3170 | 47  | 1 |
| Noctuidae | <i>Ammoconia caecimacula</i>  | BOLD:AAE6007 | 29  | 1 |
| Noctuidae | <i>Amphipyra berbera</i>      | BOLD:AAB4108 | 54  | 1 |
| Noctuidae | <i>Amphipyra pyramidea</i>    | BOLD:AAB4107 | 117 | 1 |
| Noctuidae | <i>Amphipyra tetra</i>        | BOLD:AEH0583 | 6   | 1 |
| Noctuidae | <i>Amphipyra tragopoginis</i> | BOLD:AAB3277 | 86  | 1 |
| Noctuidae | <i>Anaplectoides prasina</i>  | BOLD:AAA2948 | 225 | 1 |
| Noctuidae | <i>Anarta melanopa</i>        | BOLD:AAF8108 | 23  | 1 |
| Noctuidae | <i>Anarta odontites</i>       | BOLD:AAJ2340 | 30  | 1 |
| Noctuidae | <i>Antitype chi</i>           | BOLD:AAE7040 | 34  | 1 |
| Noctuidae | <i>Antitype suda</i>          | BOLD:AAM0440 | 4   | 1 |
| Noctuidae | <i>Apamea crenata</i>         | BOLD:AAC0154 | 82  | 1 |
| Noctuidae | <i>Apamea furva</i>           | BOLD:AAC7157 | 39  | 1 |
| Noctuidae | <i>Apamea illyria</i>         | BOLD:AAE6985 | 29  | 1 |
| Noctuidae | <i>Apamea lateritia</i>       | BOLD:ACF5481 | 48  | 2 |
| Noctuidae | <i>Apamea lithoxylaea</i>     | BOLD:AAD2274 | 49  | 1 |
| Noctuidae | <i>Apamea maillardi</i>       | BOLD:ACE5998 | 32  | 1 |
| Noctuidae | <i>Apamea monoglypha</i>      | BOLD:AAB1551 | 122 | 1 |
| Noctuidae | <i>Apamea platinea</i>        | BOLD:AAE6998 | 22  | 1 |
| Noctuidae | <i>Apamea rubrarena</i>       | BOLD:ACE5999 | 29  | 1 |
| Noctuidae | <i>Apamea scolopacina</i>     | BOLD:AAC0150 | 55  | 1 |
| Noctuidae | <i>Apamea sordens</i>         | BOLD:AAA4201 | 238 | 1 |
| Noctuidae | <i>Apamea sublustris</i>      | BOLD:AAD3064 | 38  | 1 |
| Noctuidae | <i>Apamea zeta</i>            | BOLD:ACE5996 | 41  | 2 |
| Noctuidae | <i>Apterogenum ypsilon</i>    | BOLD:AAD1478 | 43  | 1 |
| Noctuidae | <i>Atethmia centrargo</i>     | BOLD:AAC5365 | 26  | 1 |
| Noctuidae | <i>Athetis gluteosa</i>       | BOLD:AAG5875 | 29  | 1 |
| Noctuidae | <i>Athetis pallustris</i>     | BOLD:AAF5119 | 30  | 2 |
| Noctuidae | <i>Auchmis detersa</i>        | BOLD:AAJ9617 | 23  | 1 |
| Noctuidae | <i>Autographa aemula</i>      | BOLD:ABX6389 | 19  | 1 |
| Noctuidae | <i>Autographa bractea</i>     | BOLD:AAD2827 | 27  | 1 |

|           |                                |              |     |   |
|-----------|--------------------------------|--------------|-----|---|
| Noctuidae | <i>Autographa gamma</i>        | BOLD:AAB4345 | 632 | 1 |
| Noctuidae | <i>Autographa jota</i>         | BOLD:AAA3991 | 38  | 1 |
| Noctuidae | <i>Brachylomia viminalis</i>   | BOLD:AAC7236 | 50  | 1 |
| Noctuidae | <i>Bryophila domestica</i>     | BOLD:AAC3931 | 38  | 1 |
| Noctuidae | <i>Bryophila petricolor</i>    | BOLD:AEC2990 | 3   | 2 |
| Noctuidae | <i>Bryophila raptricula</i>    | BOLD:AAF1446 | 24  | 1 |
| Noctuidae | <i>Calamia tridens</i>         | BOLD:AAE8428 | 23  | 1 |
| Noctuidae | <i>Calliergis ramosa</i>       | BOLD:AAI6838 | 17  | 1 |
| Noctuidae | <i>Calophasia lunula</i>       | BOLD:AAB0052 | 76  | 1 |
| Noctuidae | <i>Caradrina morpheus</i>      | BOLD:AET1610 | 118 | 1 |
| Noctuidae | <i>Caradrina selini</i>        | BOLD:ABZ7109 | 48  | 3 |
| Noctuidae | <i>Caradrina selini</i>        | BOLD:AAB6999 | 85  | 1 |
| Noctuidae | <i>Ceramica pisi</i>           | BOLD:AAB0758 | 108 | 1 |
| Noctuidae | <i>Cerapteryx graminis</i>     | BOLD:AAB4284 | 126 | 1 |
| Noctuidae | <i>Cerastis rubricosa</i>      | BOLD:AAD2637 | 47  | 1 |
| Noctuidae | <i>Charanyca trigrammica</i>   | BOLD:AAB4764 | 50  | 1 |
| Noctuidae | <i>Chersotis alpestris</i>     | BOLD:AAJ0522 | 7   | 1 |
| Noctuidae | <i>Chersotis anatolica</i>     | BOLD:AAO4617 | 11  | 1 |
| Noctuidae | <i>Chersotis andereggii</i>    | BOLD:AAW3726 | 6   | 1 |
| Noctuidae | <i>Chersotis cuprea</i>        | BOLD:AAD0415 | 32  | 1 |
| Noctuidae | <i>Chersotis margaritacea</i>  | BOLD:AAK1278 | 24  | 1 |
| Noctuidae | <i>Chersotis multangula</i>    | BOLD:AAK1274 | 29  | 1 |
| Noctuidae | <i>Chersotis ocellina</i>      | BOLD:AAJ0524 | 15  | 1 |
| Noctuidae | <i>Chersotis oreina</i>        | BOLD:AAJ0523 | 17  | 2 |
| Noctuidae | <i>Chersotis rectangula</i>    | BOLD:AAI4264 | 13  | 1 |
| Noctuidae | <i>Chrysodeixis chalcites</i>  | BOLD:AAB3384 | 358 | 2 |
| Noctuidae | <i>Cirrhia icteritia</i>       | BOLD:AAC9311 | 62  | 1 |
| Noctuidae | <i>Cleoceris scoriacea</i>     | BOLD:AAZ9791 | 9   | 1 |
| Noctuidae | <i>Colocasia coryli</i>        | BOLD:AAC2611 | 62  | 1 |
| Noctuidae | <i>Conistra erythrocephala</i> | BOLD:AAE1819 | 43  | 1 |
| Noctuidae | <i>Conistra ligula</i>         | BOLD:AAB7880 | 377 | 1 |
| Noctuidae | <i>Conistra rubiginea</i>      | BOLD:AAD3682 | 51  | 1 |
| Noctuidae | <i>Conistra rubiginosa</i>     | BOLD:AAF0863 | 37  | 1 |
| Noctuidae | <i>Conistra vaccinii</i>       | BOLD:AAB7880 | 377 | 1 |
| Noctuidae | <i>Cosmia trapezina</i>        | BOLD:AAB9038 | 253 | 1 |
| Noctuidae | <i>Craniophora ligustri</i>    | BOLD:AAB6108 | 68  | 1 |
| Noctuidae | <i>Crypsedra gemmea</i>        | BOLD:AAF1443 | 27  | 1 |
| Noctuidae | <i>Cucullia absinthii</i>      | BOLD:AAD6480 | 20  | 1 |
| Noctuidae | <i>Cucullia campanulae</i>     | BOLD:ABX5996 | 12  | 3 |
| Noctuidae | <i>Cucullia lucifuga</i>       | BOLD:ABY6309 | 41  | 1 |
| Noctuidae | <i>Cucullia santonici</i>      | BOLD:ADZ9913 | 2   | 1 |
| Noctuidae | <i>Cucullia umbratica</i>      | BOLD:AAC0849 | 62  | 1 |
| Noctuidae | <i>Dasypolia ferdinandi</i>    | BOLD:AAV9214 | 4   | 1 |
| Noctuidae | <i>Dasypolia templi</i>        | BOLD:AAE7420 | 31  | 3 |
| Noctuidae | <i>Deltote pygarga</i>         | BOLD:AAB9793 | 63  | 1 |
| Noctuidae | <i>Deltote uncula</i>          | BOLD:AAF4745 | 23  | 1 |
| Noctuidae | <i>Diachrysia chrysis</i>      | BOLD:AAA6511 | 214 | 1 |



|           |                               |              |      |   |
|-----------|-------------------------------|--------------|------|---|
| Noctuidae | <i>Diarsia brunnea</i>        | BOLD:AAD6686 | 51   | 1 |
| Noctuidae | <i>Diarsia mendica</i>        | BOLD:ABZ6600 | 71   | 1 |
| Noctuidae | <i>Dichagyris musiva</i>      | BOLD:AAI3603 | 20   | 2 |
| Noctuidae | <i>Dichagyris nigrescens</i>  | BOLD:AAM0415 | 25   | 2 |
| Noctuidae | <i>Dichagyris renigera</i>    | BOLD:AAI9539 | 5    | 1 |
| Noctuidae | <i>Dichagyris signifera</i>   | BOLD:AAQ3451 | 21   | 1 |
| Noctuidae | <i>Dichonia convergens</i>    | BOLD:AAP7280 | 13   | 1 |
| Noctuidae | <i>Diloba caeruleocephala</i> | BOLD:AAE8447 | 32   | 1 |
| Noctuidae | <i>Elaphria venustula</i>     | BOLD:AAE0188 | 52   | 1 |
| Noctuidae | <i>Enargia paleacea</i>       | BOLD:AAA7455 | 393  | 1 |
| Noctuidae | <i>Epilecta linogrisea</i>    | BOLD:AAJ0595 | 30   | 1 |
| Noctuidae | <i>Epipsilia grisescens</i>   | BOLD:AAF4729 | 24   | 1 |
| Noctuidae | <i>Epipsilia latens</i>       | BOLD:ACF2605 | 17   | 1 |
| Noctuidae | <i>Episema glaucina</i>       | BOLD:ACF5765 | 16   | 1 |
| Noctuidae | <i>Eriopygodes imbecilla</i>  | BOLD:AAE1902 | 38   | 1 |
| Noctuidae | <i>Euchalcia modestoides</i>  | BOLD:ADG5851 | 4    | 2 |
| Noctuidae | <i>Euchalcia variabilis</i>   | BOLD:AAE1616 | 36   | 3 |
| Noctuidae | <i>Eugnorisma depuncta</i>    | BOLD:AAE4805 | 6    | 1 |
| Noctuidae | <i>Eupsilia transversa</i>    | BOLD:AAC7414 | 121  | 1 |
| Noctuidae | <i>Eurois occulta</i>         | BOLD:AAA3312 | 217  | 1 |
| Noctuidae | <i>Euxoa cos</i>              | BOLD:ABZ9295 | 19   | 3 |
| Noctuidae | <i>Euxoa culminicola</i>      | BOLD:ACF0931 | 11   | 1 |
| Noctuidae | <i>Euxoa decora</i>           | BOLD:ACF0813 | 35   | 1 |
| Noctuidae | <i>Euxoa nigricans</i>        | BOLD:ABZ9438 | 58   | 3 |
| Noctuidae | <i>Euxoa obelisca</i>         | BOLD:ACE8354 | 340  | 1 |
| Noctuidae | <i>Euxoa recussa</i>          | BOLD:ACE9579 | 39   | 1 |
| Noctuidae | <i>Euxoa tritici</i>          | BOLD:ACE8354 | 340  | 3 |
| Noctuidae | <i>Euxoa vitta</i>            | BOLD:ACE8354 | 340  | 4 |
| Noctuidae | <i>Griposia aprilina</i>      | BOLD:AAC3647 | 73   | 1 |
| Noctuidae | <i>Hada plebeja</i>           | BOLD:AAC2435 | 85   | 1 |
| Noctuidae | <i>Hadena albimacula</i>      | BOLD:AAF8086 | 26   | 1 |
| Noctuidae | <i>Hadena caesia</i>          | BOLD:AAE6864 | 33   | 3 |
| Noctuidae | <i>Hadena clara</i>           | BOLD:ACL5576 | 4    | 1 |
| Noctuidae | <i>Hadena compta</i>          | BOLD:AAC8417 | 44   | 1 |
| Noctuidae | <i>Hadena confusa</i>         | BOLD:AAC8415 | 36   | 1 |
| Noctuidae | <i>Hadena irregularis</i>     | BOLD:AAK5013 | 14   | 1 |
| Noctuidae | <i>Hadena perplexa</i>        | BOLD:AAC7968 | 49   | 2 |
| Noctuidae | <i>Hadena tephroleuca</i>     | BOLD:AAK5022 | 12   | 2 |
| Noctuidae | <i>Hecatera bicolorata</i>    | BOLD:AAD3287 | 45   | 1 |
| Noctuidae | <i>Helicoverpa armigera</i>   | BOLD:AAA5223 | 1528 | 1 |
| Noctuidae | <i>Heliothis peltigera</i>    | BOLD:AAC6990 | 64   | 1 |
| Noctuidae | <i>Heliothis virescens</i>    | BOLD:AAC5163 | 37   | 1 |
| Noctuidae | <i>Hoplodrina alsinides</i>   | BOLD:AAB4765 | 44   | 6 |
| Noctuidae | <i>Hoplodrina ambigua</i>     | BOLD:AAB0832 | 88   | 1 |
| Noctuidae | <i>Hoplodrina blanda</i>      | BOLD:AAC0362 | 88   | 2 |
| Noctuidae | <i>Hoplodrina respersa</i>    | BOLD:AAF1101 | 38   | 1 |
| Noctuidae | <i>Hoplodrina superstes</i>   | BOLD:AAK5525 | 26   | 1 |

|           |                               |              |     |   |
|-----------|-------------------------------|--------------|-----|---|
| Noctuidae | <i>Hyppa rectilinea</i>       | BOLD:ABZ5210 | 24  | 1 |
| Noctuidae | <i>Ipimorpha contusa</i>      | BOLD:AAC2458 | 40  | 1 |
| Noctuidae | <i>Lacanobia oleracea</i>     | BOLD:ABY4614 | 86  | 1 |
| Noctuidae | <i>Lacanobia splendens</i>    | BOLD:ABY4614 | 86  | 1 |
| Noctuidae | <i>Lacanobia thalassina</i>   | BOLD:ABY4615 | 58  | 1 |
| Noctuidae | <i>Lacanobia w-latinum</i>    | BOLD:AAC6463 | 54  | 2 |
| Noctuidae | <i>Lasionhada proxima</i>     | BOLD:AAD3486 | 47  | 1 |
| Noctuidae | <i>Leucania comma</i>         | BOLD:AAA3150 | 258 | 1 |
| Noctuidae | <i>Leucania loreyi</i>        | BOLD:ACE6246 | 161 | 1 |
| Noctuidae | <i>Leucania obsoleta</i>      | BOLD:AAD5689 | 36  | 1 |
| Noctuidae | <i>Lithophane ornitopus</i>   | BOLD:AAD7662 | 56  | 1 |
| Noctuidae | <i>Lithophane socia</i>       | BOLD:AAE6607 | 32  | 1 |
| Noctuidae | <i>Litologia literosa</i>     | BOLD:AAC4906 | 31  | 1 |
| Noctuidae | <i>Luteohadena luteago</i>    | BOLD:AAK5012 | 30  | 1 |
| Noctuidae | <i>Mamestra brassicae</i>     | BOLD:AAB7858 | 135 | 1 |
| Noctuidae | <i>Melanchra persicariae</i>  | BOLD:AAC7429 | 56  | 1 |
| Noctuidae | <i>Mesapamea secalella</i>    | BOLD:AAB2749 | 308 | 1 |
| Noctuidae | <i>Mesapamea secalis</i>      | BOLD:AAB2749 | 308 | 2 |
| Noctuidae | <i>Mesoligia furuncula</i>    | BOLD:AAC2820 | 71  | 1 |
| Noctuidae | <i>Mniotype adusta</i>        | BOLD:AAD5982 | 83  | 1 |
| Noctuidae | <i>Mythimna albipuncta</i>    | BOLD:AAC5487 | 63  | 1 |
| Noctuidae | <i>Mythimna andereggii</i>    | BOLD:AAE7047 | 27  | 1 |
| Noctuidae | <i>Mythimna conigera</i>      | BOLD:AAC6915 | 43  | 1 |
| Noctuidae | <i>Mythimna ferrago</i>       | BOLD:AAC2355 | 19  | 1 |
| Noctuidae | <i>Mythimna impura</i>        | BOLD:AAB9151 | 59  | 1 |
| Noctuidae | <i>Mythimna pudorina</i>      | BOLD:AAD6230 | 39  | 1 |
| Noctuidae | <i>Mythimna riparia</i>       | BOLD:AAK8682 | 13  | 1 |
| Noctuidae | <i>Mythimna sicala</i>        | BOLD:AAF8181 | 54  | 1 |
| Noctuidae | <i>Mythimna straminea</i>     | BOLD:AAC9826 | 37  | 1 |
| Noctuidae | <i>Mythimna turca</i>         | BOLD:AAF8311 | 18  | 1 |
| Noctuidae | <i>Mythimna unipuncta</i>     | BOLD:AAA2482 | 560 | 1 |
| Noctuidae | <i>Noctua comes</i>           | BOLD:AAA2633 | 138 | 1 |
| Noctuidae | <i>Noctua fimbriata</i>       | BOLD:AAA6454 | 95  | 1 |
| Noctuidae | <i>Noctua interjecta</i>      | BOLD:AAD0229 | 57  | 1 |
| Noctuidae | <i>Noctua interposita</i>     | BOLD:AAD4803 | 46  | 2 |
| Noctuidae | <i>Noctua janthe</i>          | BOLD:AAA7574 | 119 | 1 |
| Noctuidae | <i>Noctua orbona</i>          | BOLD:AAI2734 | 30  | 1 |
| Noctuidae | <i>Noctua tirrenica</i>       | BOLD:ABX5040 | 36  | 1 |
| Noctuidae | <i>Nyctobrya muralis</i>      | BOLD:AAN0805 | 9   | 2 |
| Noctuidae | <i>Ochropleura plecta</i>     | BOLD:ACE7640 | 34  | 1 |
| Noctuidae | <i>Oligia latruncula</i>      | BOLD:AAB7661 | 115 | 5 |
| Noctuidae | <i>Oligia strigilis</i>       | BOLD:AAB4833 | 230 | 1 |
| Noctuidae | <i>Omia cymbalariae</i>       | BOLD:AAV3137 | 9   | 1 |
| Noctuidae | <i>Orthosia cerasi</i>        | BOLD:AAC3426 | 694 | 1 |
| Noctuidae | <i>Orthosia gothica</i>       | BOLD:AAB6211 | 195 | 1 |
| Noctuidae | <i>Pachetra sagittigera</i>   | BOLD:AAC1169 | 17  | 1 |
| Noctuidae | <i>Panchrysia v-argenteum</i> | BOLD:AAK4661 | 14  | 1 |

|              |                                  |              |     |   |
|--------------|----------------------------------|--------------|-----|---|
| Noctuidae    | <i>Panolis flammea</i>           | BOLD:AAC5406 | 47  | 1 |
| Noctuidae    | <i>Papestra biren</i>            | BOLD:AAA9849 | 119 | 1 |
| Noctuidae    | <i>Peridroma saucia</i>          | BOLD:AAA6377 | 281 | 1 |
| Noctuidae    | <i>Phlogophora meticulosa</i>    | BOLD:AAB7358 | 72  | 1 |
| Noctuidae    | <i>Phlogophora scita</i>         | BOLD:AAY0718 | 11  | 1 |
| Noctuidae    | <i>Polia bombycina</i>           | BOLD:AAD1839 | 52  | 1 |
| Noctuidae    | <i>Polia nebulosa</i>            | BOLD:AAE1369 | 60  | 1 |
| Noctuidae    | <i>Polymixis polymita</i>        | BOLD:AAH7734 | 13  | 1 |
| Noctuidae    | <i>Polymixis rufocincta</i>      | BOLD:AAL6852 | 14  | 1 |
| Noctuidae    | <i>Polymixis xanthomista</i>     | BOLD:AAY2828 | 22  | 2 |
| Noctuidae    | <i>Rhyacia helvetina</i>         | BOLD:AAE3592 | 19  | 1 |
| Noctuidae    | <i>Rhyacia simulans</i>          | BOLD:ACE3548 | 18  | 1 |
| Noctuidae    | <i>Rusina ferruginea</i>         | BOLD:AAB9497 | 84  | 1 |
| Noctuidae    | <i>Sideridis lampra</i>          | BOLD:AAJ6736 | 7   | 1 |
| Noctuidae    | <i>Sideridis reticulata</i>      | BOLD:AAD4204 | 44  | 1 |
| Noctuidae    | <i>Sideridis rivularis</i>       | BOLD:AAC8418 | 47  | 1 |
| Noctuidae    | <i>Spodoptera exigua</i>         | BOLD:AAA6644 | 645 | 2 |
| Noctuidae    | <i>Standfussiana lucernea</i>    | BOLD:AAE9254 | 41  | 1 |
| Noctuidae    | <i>Standfussiana wiskotti</i>    | BOLD:AAH9960 | 10  | 2 |
| Noctuidae    | <i>Syngrapha ain</i>             | BOLD:ABZ6944 | 26  | 1 |
| Noctuidae    | <i>Syngrapha interrogationis</i> | BOLD:AAB3481 | 69  | 1 |
| Noctuidae    | <i>Tholera cespitis</i>          | BOLD:ACE5542 | 18  | 1 |
| Noctuidae    | <i>Tholera decimalis</i>         | BOLD:AAC9682 | 46  | 1 |
| Noctuidae    | <i>Tiliacea aurago</i>           | BOLD:AAD4895 | 44  | 1 |
| Noctuidae    | <i>Trichoplusia ni</i>           | BOLD:AAC3410 | 51  | 2 |
| Noctuidae    | <i>Valeria oleagina</i>          | BOLD:AAJ8090 | 10  | 1 |
| Noctuidae    | <i>Xanthia togata</i>            | BOLD:AAC9312 | 41  | 1 |
| Noctuidae    | <i>Xestia alpicola</i>           | BOLD:ABZ1718 | 38  | 1 |
| Noctuidae    | <i>Xestia ashworthii</i>         | BOLD:ABY8432 | 42  | 1 |
| Noctuidae    | <i>Xestia baja</i>               | BOLD:AAA2590 | 421 | 1 |
| Noctuidae    | <i>Xestia c-nigrum</i>           | BOLD:AAA2144 | 450 | 1 |
| Noctuidae    | <i>Xestia ditrapezium</i>        | BOLD:AAM0068 | 84  | 1 |
| Noctuidae    | <i>Xestia ochreago</i>           | BOLD:AAJ9109 | 11  | 1 |
| Noctuidae    | <i>Xestia rhomboidea</i>         | BOLD:AAF0752 | 31  | 1 |
| Noctuidae    | <i>Xestia triangulum</i>         | BOLD:AAB8843 | 58  | 1 |
| Noctuidae    | <i>Xestia viridescens</i>        | BOLD:AAA2275 | 15  | 4 |
| Noctuidae    | <i>Xestia xanthographa</i>       | BOLD:AAA6806 | 170 | 1 |
| Nolidae      | <i>Bena bicolorana</i>           | BOLD:AAB8808 | 66  | 1 |
| Nolidae      | <i>Earias clorana</i>            | BOLD:AAC7224 | 55  | 1 |
| Nolidae      | <i>Meganola albula</i>           | BOLD:AAD8315 | 33  | 1 |
| Nolidae      | <i>Meganola strigula</i>         | BOLD:AAD8314 | 34  | 1 |
| Nolidae      | <i>Nola confusalis</i>           | BOLD:AAB5563 | 56  | 1 |
| Nolidae      | <i>Nola subchlamydula</i>        | BOLD:ABZ0431 | 19  | 2 |
| Nolidae      | <i>Nycteola asiatica</i>         | BOLD:AAF3048 | 21  | 1 |
| Nolidae      | <i>Nycteola revayana</i>         | BOLD:AAB8993 | 80  | 1 |
| Nolidae      | <i>Pseudoips prasinana</i>       | BOLD:AAB8807 | 80  | 1 |
| Notodontidae | <i>Clostera pigra</i>            | BOLD:AAD5412 | 37  | 1 |

|              |                                |              |     |   |
|--------------|--------------------------------|--------------|-----|---|
| Notodontidae | <i>Drymonia dodonaea</i>       | BOLD:AAD7692 | 35  | 1 |
| Notodontidae | <i>Furcula furcula</i>         | BOLD:ACF2827 | 74  | 1 |
| Notodontidae | <i>Gluphisia crenata</i>       | BOLD:AAE0994 | 28  | 1 |
| Notodontidae | <i>Harpyia milhauseri</i>      | BOLD:AAF1768 | 29  | 1 |
| Notodontidae | <i>Notodonta dromedarius</i>   | BOLD:AAC1145 | 55  | 1 |
| Notodontidae | <i>Notodonta tritophus</i>     | BOLD:AAE2131 | 28  | 1 |
| Notodontidae | <i>Notodonta ziczac</i>        | BOLD:ABY9866 | 55  | 1 |
| Notodontidae | <i>Pheosia gnoma</i>           | BOLD:AAC5101 | 30  | 1 |
| Notodontidae | <i>Ptilodon capucina</i>       | BOLD:AAC0728 | 51  | 1 |
| Notodontidae | <i>Ptilodon cucullina</i>      | BOLD:AAD2656 | 37  | 1 |
| Notodontidae | <i>Stauropus fagi</i>          | BOLD:AAD0646 | 50  | 1 |
| Notodontidae | <i>Thaumetopoea pityocampa</i> | BOLD:AAK2887 | 61  | 1 |
| Nymphalidae  | <i>Aglais urticae</i>          | BOLD:AAA9652 | 319 | 1 |
| Nymphalidae  | <i>Argynnis aglaja</i>         | BOLD:AAB2322 | 173 | 1 |
| Nymphalidae  | <i>Argynnis paphia</i>         | BOLD:AAA8958 | 190 | 1 |
| Nymphalidae  | <i>Boloria napaea</i>          | BOLD:AAA9406 | 185 | 1 |
| Nymphalidae  | <i>Boloria pales</i>           | BOLD:ACE7514 | 100 | 1 |
| Nymphalidae  | <i>Boloria titania</i>         | BOLD:ACS2433 | 65  | 1 |
| Nymphalidae  | <i>Brenthis daphne</i>         | BOLD:AAA9312 | 365 | 1 |
| Nymphalidae  | <i>Brintesia circe</i>         | BOLD:AAB5533 | 113 | 1 |
| Nymphalidae  | <i>Coenonympha arcania</i>     | BOLD:ACF1425 | 82  | 1 |
| Nymphalidae  | <i>Coenonympha gardetta</i>    | BOLD:AAB1120 | 156 | 1 |
| Nymphalidae  | <i>Coenonympha pamphilus</i>   | BOLD:AAA7351 | 347 | 1 |
| Nymphalidae  | <i>Erebia aethiopellus</i>     | BOLD:ABY7699 | 12  | 1 |
| Nymphalidae  | <i>Erebia alberganus</i>       | BOLD:ABA8687 | 68  | 1 |
| Nymphalidae  | <i>Erebia cassioides</i>       | BOLD:AAB3453 | 208 | 2 |
| Nymphalidae  | <i>Erebia epiphron</i>         | BOLD:AAB0969 | 273 | 1 |
| Nymphalidae  | <i>Erebia gorge</i>            | BOLD:AAC0261 | 80  | 1 |
| Nymphalidae  | <i>Erebia ligea</i>            | BOLD:AAA8264 | 487 | 1 |
| Nymphalidae  | <i>Erebia melampus</i>         | BOLD:AAC5377 | 73  | 2 |
| Nymphalidae  | <i>Erebia mnestra</i>          | BOLD:AAF0158 | 28  | 1 |
| Nymphalidae  | <i>Erebia neoridas</i>         | BOLD:ACD7349 | 59  | 1 |
| Nymphalidae  | <i>Erebia pandrose</i>         | BOLD:AAB3454 | 97  | 2 |
| Nymphalidae  | <i>Euphydryas cynthia</i>      | BOLD:AAJ0031 | 23  | 1 |
| Nymphalidae  | <i>Fabriciana niobe</i>        | BOLD:ABY9182 | 166 | 3 |
| Nymphalidae  | <i>Hipparchia semele</i>       | BOLD:AAB0589 | 269 | 1 |
| Nymphalidae  | <i>Hyponephele lycaon</i>      | BOLD:AAA9909 | 154 | 1 |
| Nymphalidae  | <i>Issoria lathonia</i>        | BOLD:AAA8713 | 180 | 1 |
| Nymphalidae  | <i>Lasiommata maera</i>        | BOLD:AAA8853 | 232 | 1 |
| Nymphalidae  | <i>Lasiommata megera</i>       | BOLD:AAB0123 | 342 | 1 |
| Nymphalidae  | <i>Maniola jurtina</i>         | BOLD:AAA7785 | 878 | 1 |
| Nymphalidae  | <i>Melanargia galathea</i>     | BOLD:ACR2217 | 508 | 2 |
| Nymphalidae  | <i>Melitaea celadussa</i>      | BOLD:AAA7584 | 199 | 1 |
| Nymphalidae  | <i>Melitaea cinxia</i>         | BOLD:AAA3799 | 60  | 1 |
| Nymphalidae  | <i>Melitaea didyma</i>         | BOLD:ABY6037 | 91  | 2 |
| Nymphalidae  | <i>Melitaea phoebe</i>         | BOLD:AAA7370 | 303 | 1 |
| Nymphalidae  | <i>Nymphalis antiopa</i>       | BOLD:AAA7166 | 136 | 1 |

|               |                                    |              |      |   |
|---------------|------------------------------------|--------------|------|---|
| Nymphalidae   | <i>Polygonia c-album</i>           | BOLD:ABY7043 | 273  | 1 |
| Nymphalidae   | <i>Satyrus ferula</i>              | BOLD:AAC4737 | 162  | 2 |
| Nymphalidae   | <i>Vanessa cardui</i>              | BOLD:AAA5337 | 430  | 1 |
| Oecophoridae  | <i>Alabonia sp.</i>                | BOLD:AEA2906 | 7    | 6 |
| Oecophoridae  | <i>Batia internella</i>            | BOLD:ABW5898 | 12   | 1 |
| Oecophoridae  | <i>Batia lambdella</i>             | BOLD:AAK0036 | 27   | 1 |
| Oecophoridae  | <i>Borkhausenia fuscescens</i>     | BOLD:AAD4407 | 67   | 3 |
| Oecophoridae  | <i>Crassa tinctella</i>            | BOLD:AAE3946 | 31   | 1 |
| Oecophoridae  | <i>Denisia fuscicapitella</i>      | BOLD:AAU3742 | 11   | 7 |
| Oecophoridae  | <i>Denisia sp. 1</i>               | BOLD:AEC5998 | 1    | 1 |
| Oecophoridae  | <i>Denisia sp. 2</i>               | BOLD:AEF7084 | 3    | 3 |
| Oecophoridae  | <i>Denisia stipella</i>            | BOLD:AAD6108 | 40   | 2 |
| Oecophoridae  | <i>Pleurota sp. TAB5</i>           | BOLD:AAO3113 | 22   | 4 |
| Oecophoridae  | <i>Schiffmuelleria grandis</i>     | BOLD:ACR4462 | 5    | 1 |
| Papilionidae  | <i>Iphiclides podalirius</i>       | BOLD:AAB2272 | 199  | 1 |
| Pieridae      | <i>Anthocharis cardamines</i>      | BOLD:AAB1133 | 205  | 1 |
| Pieridae      | <i>Aporia crataegi</i>             | BOLD:AAA8773 | 367  | 1 |
| Pieridae      | <i>Colias alfacariensis</i>        | BOLD:ABZ4715 | 180  | 1 |
| Pieridae      | <i>Colias croceus</i>              | BOLD:ABZ3039 | 446  | 1 |
| Pieridae      | <i>Colias phicomone</i>            | BOLD:ACF0844 | 116  | 1 |
| Pieridae      | <i>Gonepteryx rhamni</i>           | BOLD:AAA9222 | 195  | 1 |
| Pieridae      | <i>Pieris napi</i>                 | BOLD:AAA2226 | 759  | 3 |
| Plutellidae   | <i>Plutella xylostella</i>         | BOLD:AAA1513 | 3993 | 1 |
| Plutellidae   | <i>Rhigognostis senilella</i>      | BOLD:AAF7514 | 32   | 1 |
| Prodoxidae    | <i>Lampronia corticella</i>        | BOLD:AAD7517 | 35   | 1 |
| Prodoxidae    | <i>Lampronia rupella</i>           | BOLD:AAD5208 | 30   | 1 |
| Psychidae     | <i>Apterona helicoidella</i>       | BOLD:AAJ8898 | 13   | 1 |
| Psychidae     | <i>Bijugis bombycella</i>          | BOLD:ADZ9474 | 1    | 1 |
| Psychidae     | <i>Canephora hirsuta</i>           | BOLD:AAI6446 | 26   | 1 |
| Psychidae     | <i>Eumasia parietariella</i>       | BOLD:AAP7286 | 32   | 1 |
| Psychidae     | <i>Proutia betulina</i>            | BOLD:AAF6273 | 34   | 1 |
| Psychidae     | <i>Ptilocephala pyrenaella</i>     | BOLD:ACS1987 | 2    | 1 |
| Psychidae     | <i>Sterrhopterix fusca</i>         | BOLD:AAF3135 | 31   | 1 |
| Psychidae     | <i>Taleporia tubulosa</i>          | BOLD:ADK7926 | 26   | 1 |
| Pterophoridae | <i>Agdistis adactyla</i>           | BOLD:AAJ7483 | 11   | 1 |
| Pterophoridae | <i>Amblyptilia acanthadactyla</i>  | BOLD:AAD4269 | 42   | 1 |
| Pterophoridae | <i>Calyciphora nephelodactyla</i>  | BOLD:AAO3405 | 5    | 1 |
| Pterophoridae | <i>Cnaemidophorus rhododactyla</i> | BOLD:AAC3810 | 39   | 1 |
| Pterophoridae | <i>Crombruggia buvati</i>          | BOLD:AAM2543 | 32   | 1 |
| Pterophoridae | <i>Crombruggia lantoscanus</i>     | BOLD:AAM6026 | 8    | 1 |
| Pterophoridae | <i>Emmelina monodactyla</i>        | BOLD:ACE4862 | 114  | 1 |
| Pterophoridae | <i>Hellinsia didactylites</i>      | BOLD:AAD5641 | 20   | 1 |
| Pterophoridae | <i>Marasmarcha lunaedactyla</i>    | BOLD:AEC3700 | 2    | 1 |
| Pterophoridae | <i>Merrifieldia leucodactyla</i>   | BOLD:AAE1533 | 26   | 1 |
| Pterophoridae | <i>Merrifieldia tridactyla</i>     | BOLD:AAD3689 | 28   | 2 |
| Pterophoridae | <i>Oidaematophorus rogenhoferi</i> | BOLD:AAE5830 | 25   | 1 |
| Pterophoridae | <i>Oxyptilus pilosellae</i>        | BOLD:AAD7066 | 11   | 2 |

|               |                                   |              |     |   |
|---------------|-----------------------------------|--------------|-----|---|
| Pterophoridae | <i>Paraplatyptilia metzneri</i>   | BOLD:ACS5872 | 11  | 1 |
| Pterophoridae | <i>Platyptilia farfarellus</i>    | BOLD:AAU0815 | 13  | 1 |
| Pterophoridae | <i>Platyptilia gonodactyla</i>    | BOLD:AAD4179 | 42  | 1 |
| Pterophoridae | <i>Procapperia linariae</i>       | BOLD:AAV5270 | 12  | 4 |
| Pterophoridae | <i>Procapperia maculata</i>       | BOLD:AAI2580 | 3   | 2 |
| Pterophoridae | <i>Pterophorus pentadactyla</i>   | BOLD:AAD9479 | 40  | 2 |
| Pterophoridae | <i>Stenoptilia aridus</i>         | BOLD:ABW6859 | 8   | 1 |
| Pterophoridae | <i>Stenoptilia coprodactylus</i>  | BOLD:AAE2283 | 46  | 3 |
| Pterophoridae | <i>Stenoptilia mariaeluisae</i>   | BOLD:AAV8866 | 21  | 2 |
| Pterophoridae | <i>Stenoptilia plagiodactylus</i> | BOLD:AAO2603 | 32  | 2 |
| Pterophoridae | <i>Stenoptilia pterodactyla</i>   | BOLD:AAC7533 | 38  | 1 |
| Pyralidae     | <i>Acrobasis marmorea</i>         | BOLD:AAE8113 | 24  | 1 |
| Pyralidae     | <i>Acrobasis suavella</i>         | BOLD:AAH4680 | 33  | 1 |
| Pyralidae     | <i>Ancylosis cinnamomella</i>     | BOLD:AAF4057 | 16  | 1 |
| Pyralidae     | <i>Aphomia sociella</i>           | BOLD:AAA5606 | 130 | 1 |
| Pyralidae     | <i>Asarta aethiopella</i>         | BOLD:ABY6194 | 17  | 1 |
| Pyralidae     | <i>Assara terebrella</i>          | BOLD:ACF3901 | 51  | 1 |
| Pyralidae     | <i>Catastia marginea</i>          | BOLD:AAE9528 | 25  | 1 |
| Pyralidae     | <i>Cremnophila sedakovella</i>    | BOLD:AAV4121 | 4   | 1 |
| Pyralidae     | <i>Dioryctria abietella</i>       | BOLD:AAB6957 | 71  | 1 |
| Pyralidae     | <i>Dioryctria simplicella</i>     | BOLD:AAB6958 | 45  | 1 |
| Pyralidae     | <i>Elegia similella</i>           | BOLD:AAF4938 | 22  | 1 |
| Pyralidae     | <i>Endotricha flammealis</i>      | BOLD:AAC5906 | 98  | 1 |
| Pyralidae     | <i>Ephestia sp.</i>               | BOLD:ACY1394 | 2   | 1 |
| Pyralidae     | <i>Epischnia ampliata</i>         | BOLD:ACO5839 | 2   | 1 |
| Pyralidae     | <i>Episcythraetis tetricella</i>  | BOLD:AAJ0642 | 23  | 1 |
| Pyralidae     | <i>Euzophera cinerosella</i>      | BOLD:AAJ0516 | 18  | 1 |
| Pyralidae     | <i>Euzophera pinguis</i>          | BOLD:AAC0332 | 40  | 1 |
| Pyralidae     | <i>Galleria mellonella</i>        | BOLD:AAA0965 | 151 | 1 |
| Pyralidae     | <i>Hypochalcia ahenella</i>       | BOLD:AAD0238 | 43  | 1 |
| Pyralidae     | <i>Hypsopygia costalis</i>        | BOLD:AAA9616 | 75  | 1 |
| Pyralidae     | <i>Lymphia chalybella</i>         | BOLD:AEV2155 | 1   | 1 |
| Pyralidae     | <i>Matilella fusca</i>            | BOLD:AAA4759 | 195 | 1 |
| Pyralidae     | <i>Megasis rippertella</i>        | BOLD:AAO3196 | 5   | 1 |
| Pyralidae     | <i>Myelois circumvoluta</i>       | BOLD:AAC3277 | 32  | 1 |
| Pyralidae     | <i>Nephoterix angustella</i>      | BOLD:AAD0751 | 34  | 1 |
| Pyralidae     | <i>Nyctegretis lineana</i>        | BOLD:AAE5583 | 26  | 1 |
| Pyralidae     | <i>Oncocera semirubella</i>       | BOLD:AAD7672 | 80  | 1 |
| Pyralidae     | <i>Pempelia compositella</i>      | BOLD:AAK3923 | 16  | 2 |
| Pyralidae     | <i>Pempelia palumbella</i>        | BOLD:AAD6529 | 38  | 1 |
| Pyralidae     | <i>Pempeliella ornatella</i>      | BOLD:AAC8912 | 37  | 1 |
| Pyralidae     | <i>Phycitodes saxicola</i>        | BOLD:AAD9531 | 47  | 3 |
| Pyralidae     | <i>Pima boisduvaliella</i>        | BOLD:AAQ0520 | 22  | 1 |
| Pyralidae     | <i>Pyralis regalis</i>            | BOLD:AAP5668 | 36  | 1 |
| Pyralidae     | <i>Sciota adelphella</i>          | BOLD:AAE3809 | 19  | 1 |
| Pyralidae     | <i>Sciota hostilis</i>            | BOLD:AAD3590 | 31  | 1 |
| Pyralidae     | <i>Selagia spadicella</i>         | BOLD:AAE1543 | 32  | 1 |

|              |                                    |              |     |   |
|--------------|------------------------------------|--------------|-----|---|
| Saturniidae  | <i>Agria tau</i>                   | BOLD:AAB6586 | 49  | 1 |
| Scythrididae | <i>Scythris clavella</i>           | BOLD:AAG7095 | 47  | 5 |
| Scythrididae | <i>Scythris cuspidella</i>         | BOLD:ABZ1088 | 13  | 3 |
| Scythrididae | <i>Scythris obscurella</i>         | BOLD:AAF1117 | 32  | 1 |
| Scythrididae | <i>Scythris scopolella</i>         | BOLD:AAH9851 | 13  | 1 |
| Sesiidae     | <i>Synanthedon conopiformis</i>    | BOLD:AAE8732 | 23  | 1 |
| Sphingidae   | <i>Agrius convolvuli</i>           | BOLD:AAA2393 | 162 | 1 |
| Sphingidae   | <i>Hyles euphorbiae</i>            | BOLD:ACE8861 | 550 | 1 |
| Sphingidae   | <i>Hyles gallii</i>                | BOLD:ACE4003 | 135 | 1 |
| Sphingidae   | <i>Hyles livornica</i>             | BOLD:ABY8586 | 108 | 1 |
| Sphingidae   | <i>Laothoe populi</i>              | BOLD:AAB3599 | 82  | 1 |
| Sphingidae   | <i>Macroglossum stellatarum</i>    | BOLD:AAD3062 | 51  | 1 |
| Sphingidae   | <i>Mimas tiliae</i>                | BOLD:AAB6049 | 38  | 1 |
| Sphingidae   | <i>Smerinthus ocellatus</i>        | BOLD:AAB8491 | 16  | 1 |
| Sphingidae   | <i>Sphinx maurorum</i>             | BOLD:AAA8863 | 79  | 1 |
| Tineidae     | <i>Cephimallota crassiflavella</i> | BOLD:AAK0884 | 27  | 1 |
| Tineidae     | <i>Infurcitinea atrifasciella</i>  | BOLD:AAV6725 | 10  | 2 |
| Tineidae     | <i>Infurcitinea atrifasciella</i>  | BOLD:AEM6427 | 1   | 1 |
| Tineidae     | <i>Infurcitinea ignicomella</i>    | BOLD:AEA1501 | 1   | 1 |
| Tineidae     | <i>Infurcitinea roesslerella</i>   | BOLD:AEA0022 | 3   | 3 |
| Tineidae     | <i>Infurcitinea roesslerella</i>   | BOLD:ADK8354 | 4   | 2 |
| Tineidae     | <i>Monopis laevigella</i>          | BOLD:AAB6631 | 75  | 1 |
| Tineidae     | <i>Monopis monachella</i>          | BOLD:AAB1740 | 21  | 1 |
| Tineidae     | <i>Monopis obviella</i>            | BOLD:AAE4726 | 45  | 2 |
| Tineidae     | <i>Myrmecozela ochraceella</i>     | BOLD:AEV6569 | 2   | 1 |
| Tineidae     | <i>Nemapogon ruricolella</i>       | BOLD:AAC5132 | 12  | 2 |
| Tineidae     | <i>Nemapogon variatella</i>        | BOLD:AAI3059 | 61  | 1 |
| Tineidae     | <i>Tinea pellionella</i>           | BOLD:AAB9203 | 44  | 1 |
| Tineidae     | <i>Tinea trinotella</i>            | BOLD:AAD5562 | 33  | 1 |
| Tineidae     | <i>Triaxomera parasitella</i>      | BOLD:AAF4848 | 7   | 1 |
| Tischeriidae | <i>Coptotriche marginea</i>        | BOLD:AAF5585 | 58  | 2 |
| Tortricidae  | <i>Acleris bergmanniana</i>        | BOLD:ADZ8946 | 2   | 1 |
| Tortricidae  | <i>Acleris emargana</i>            | BOLD:AAB3524 | 46  | 1 |
| Tortricidae  | <i>Acleris ferrugana</i>           | BOLD:AAC3487 | 64  | 1 |
| Tortricidae  | <i>Acleris forsskaleana</i>        | BOLD:AAA8796 | 96  | 1 |
| Tortricidae  | <i>Acleris hastiana</i>            | BOLD:AAA9796 | 78  | 1 |
| Tortricidae  | <i>Acleris literana</i>            | BOLD:AAN0464 | 17  | 1 |
| Tortricidae  | <i>Acleris logiana</i>             | BOLD:AAB0755 | 18  | 1 |
| Tortricidae  | <i>Acleris rhombana</i>            | BOLD:AAE3741 | 69  | 1 |
| Tortricidae  | <i>Acleris sparsana</i>            | BOLD:AAD2160 | 42  | 1 |
| Tortricidae  | <i>Acleris variegana</i>           | BOLD:ACE3007 | 51  | 1 |
| Tortricidae  | <i>Aethes cnicana</i>              | BOLD:AAC2885 | 104 | 2 |
| Tortricidae  | <i>Aethes hartmanniana</i>         | BOLD:AAC6718 | 56  | 2 |
| Tortricidae  | <i>Aethes smeathmanniana</i>       | BOLD:AAB1945 | 71  | 1 |
| Tortricidae  | <i>Agapeta hamana</i>              | BOLD:AAB9919 | 69  | 1 |
| Tortricidae  | <i>Agapeta sp.</i>                 | BOLD:AEG7231 | 1   | 1 |
| Tortricidae  | <i>Ancylis comptana</i>            | BOLD:ABX5131 | 32  | 1 |

|             |                                  |              |     |   |
|-------------|----------------------------------|--------------|-----|---|
| Tortricidae | <i>Ancylis laetana</i>           | BOLD:AAE1220 | 22  | 1 |
| Tortricidae | <i>Ancylis myrtillana</i>        | BOLD:ABZ7857 | 41  | 1 |
| Tortricidae | <i>Ancylis unculana</i>          | BOLD:AAD3930 | 12  | 1 |
| Tortricidae | <i>Aphelia viburnana</i>         | BOLD:AAA7813 | 131 | 1 |
| Tortricidae | <i>Apotomis capreana</i>         | BOLD:ABZ6958 | 338 | 1 |
| Tortricidae | <i>Apotomis semifasciana</i>     | BOLD:ABZ6958 | 338 | 1 |
| Tortricidae | <i>Archips podana</i>            | BOLD:AAB5839 | 73  | 2 |
| Tortricidae | <i>Archips rosana</i>            | BOLD:AAB9404 | 124 | 1 |
| Tortricidae | <i>Argyrotaenia ljugiana</i>     | BOLD:AAA2955 | 458 | 3 |
| Tortricidae | <i>Aterpia corticana</i>         | BOLD:AAF5178 | 18  | 1 |
| Tortricidae | <i>Bactra lancealana</i>         | BOLD:AAB8686 | 127 | 1 |
| Tortricidae | <i>Brevicornutia pallidana</i>   | BOLD:AAE1297 | 38  | 1 |
| Tortricidae | <i>Celypha cespitana</i>         | BOLD:AAA9471 | 54  | 1 |
| Tortricidae | <i>Celypha doubledayana</i>      | BOLD:AAY7649 | 11  | 1 |
| Tortricidae | <i>Celypha lacunana</i>          | BOLD:AAC3531 | 194 | 3 |
| Tortricidae | <i>Celypha rufana</i>            | BOLD:AAD6286 | 41  | 1 |
| Tortricidae | <i>Celypha striana</i>           | BOLD:AAC1559 | 99  | 1 |
| Tortricidae | <i>Clepsis consimilana</i>       | BOLD:AAC4212 | 89  | 1 |
| Tortricidae | <i>Clepsis rogana</i>            | BOLD:AAF4502 | 21  | 2 |
| Tortricidae | <i>Clepsis rurinana</i>          | BOLD:AAF4503 | 42  | 1 |
| Tortricidae | <i>Cnephasia alticolana</i>      | BOLD:ACF2531 | 65  | 2 |
| Tortricidae | <i>Cnephasia asseclana</i>       | BOLD:AAA6293 | 209 | 3 |
| Tortricidae | <i>Cnephasia genitalana</i>      | BOLD:AAC7742 | 127 | 1 |
| Tortricidae | <i>Cnephasia incertana</i>       | BOLD:AAC4535 | 45  | 1 |
| Tortricidae | <i>Cnephasia sedana</i>          | BOLD:AAF4369 | 24  | 2 |
| Tortricidae | <i>Cnephasia stephensiana</i>    | BOLD:AAA6292 | 167 | 3 |
| Tortricidae | <i>Cochylimorpha tiraculana</i>  | BOLD:AEC3159 | 3   | 3 |
| Tortricidae | <i>Crociosema plebejana</i>      | BOLD:ACE9795 | 163 | 1 |
| Tortricidae | <i>Cydia duplicana</i>           | BOLD:ABZ7551 | 12  | 1 |
| Tortricidae | <i>Cydia fagiglandana</i>        | BOLD:AAC5023 | 65  | 1 |
| Tortricidae | <i>Cydia illutana</i>            | BOLD:AAD5427 | 27  | 1 |
| Tortricidae | <i>Cydia pomonella</i>           | BOLD:AAA3532 | 370 | 1 |
| Tortricidae | <i>Cydia splendana</i>           | BOLD:AAC0640 | 84  | 1 |
| Tortricidae | <i>Cydia succedana</i>           | BOLD:AAB7159 | 60  | 2 |
| Tortricidae | <i>Cydia succedana</i>           | BOLD:ACF3585 | 113 | 2 |
| Tortricidae | <i>Dichrorampha agilana</i>      | BOLD:AAF5544 | 13  | 1 |
| Tortricidae | <i>Dichrorampha alpinana</i>     | BOLD:AAE7519 | 16  | 1 |
| Tortricidae | <i>Dichrorampha ligulana</i>     | BOLD:AAX9221 | 3   | 1 |
| Tortricidae | <i>Dichrorampha petiverella</i>  | BOLD:AAC9827 | 52  | 2 |
| Tortricidae | <i>Dichrorampha tarmanni</i>     | BOLD:AAA8637 | 168 | 1 |
| Tortricidae | <i>Dichrorampha vancouverana</i> | BOLD:AAC1223 | 55  | 1 |
| Tortricidae | <i>Ditula angustiorana</i>       | BOLD:AAA8699 | 83  | 1 |
| Tortricidae | <i>Eana argentana</i>            | BOLD:AAA8425 | 97  | 1 |
| Tortricidae | <i>Eana canescana</i>            | BOLD:ACF0848 | 8   | 2 |
| Tortricidae | <i>Eana derivana</i>             | BOLD:AAI8856 | 28  | 2 |
| Tortricidae | <i>Eana osseana</i>              | BOLD:AAA6265 | 30  | 1 |
| Tortricidae | <i>Eana penziana</i>             | BOLD:AAB8228 | 49  | 2 |



|             |                                  |              |     |   |
|-------------|----------------------------------|--------------|-----|---|
| Tortricidae | <i>Endothenia quadrimaculana</i> | BOLD:AAD4973 | 29  | 1 |
| Tortricidae | <i>Epagoge grotiana</i>          | BOLD:AAD6395 | 41  | 1 |
| Tortricidae | <i>Epiblema graphana</i>         | BOLD:AAF2249 | 33  | 1 |
| Tortricidae | <i>Epiblema scutulana</i>        | BOLD:AAP7460 | 8   | 2 |
| Tortricidae | <i>Epinotia cruciana</i>         | BOLD:AAC2644 | 104 | 1 |
| Tortricidae | <i>Epinotia mercuriana</i>       | BOLD:AAE1186 | 20  | 1 |
| Tortricidae | <i>Epinotia ramella</i>          | BOLD:ADU4594 | 7   | 1 |
| Tortricidae | <i>Epinotia subocellana</i>      | BOLD:AAB8745 | 30  | 1 |
| Tortricidae | <i>Epinotia tenerana</i>         | BOLD:AAD1776 | 62  | 1 |
| Tortricidae | <i>Epinotia thapsiana</i>        | BOLD:AAC8348 | 21  | 1 |
| Tortricidae | <i>Eriopsela fenestrellensis</i> | BOLD:ADO3293 | 2   | 1 |
| Tortricidae | <i>Eucosma aspidiscana</i>       | BOLD:ACE7836 | 65  | 2 |
| Tortricidae | <i>Eucosma cana</i>              | BOLD:AAB4296 | 87  | 1 |
| Tortricidae | <i>Eucosma conterminana</i>      | BOLD:AAC3321 | 43  | 2 |
| Tortricidae | <i>Eucosma hohenwartiana</i>     | BOLD:AAB4295 | 139 | 4 |
| Tortricidae | <i>Eucosma pupillana</i>         | BOLD:AAU4276 | 13  | 1 |
| Tortricidae | <i>Eucosma scorzonera</i>        | BOLD:AAD0162 | 64  | 1 |
| Tortricidae | <i>Eudemis porphyra</i>          | BOLD:AAC6854 | 29  | 1 |
| Tortricidae | <i>Eulia ministrana</i>          | BOLD:AAA7315 | 85  | 1 |
| Tortricidae | <i>Eupoecilia angustana</i>      | BOLD:AAC8058 | 42  | 3 |
| Tortricidae | <i>Falseuncaria ruficiliana</i>  | BOLD:AAD2822 | 59  | 1 |
| Tortricidae | <i>Grapholita caecana</i>        | BOLD:AAL3235 | 19  | 2 |
| Tortricidae | <i>Grapholita fissana</i>        | BOLD:ABX9106 | 15  | 1 |
| Tortricidae | <i>Gypsonoma nitidulana</i>      | BOLD:AAB1285 | 169 | 1 |
| Tortricidae | <i>Gypsonoma oppressana</i>      | BOLD:AAE3621 | 11  | 1 |
| Tortricidae | <i>Gypsonoma sociana</i>         | BOLD:AAA6642 | 34  | 2 |
| Tortricidae | <i>Hedya ochroleucana</i>        | BOLD:AAC0586 | 29  | 2 |
| Tortricidae | <i>Hedya pruniana</i>            | BOLD:AAD0577 | 49  | 1 |
| Tortricidae | <i>Hedya salicella</i>           | BOLD:AAD6484 | 31  | 1 |
| Tortricidae | <i>Isotrias rectifasciana</i>    | BOLD:AAE5807 | 48  | 1 |
| Tortricidae | <i>Lathronympha strigana</i>     | BOLD:AAC1866 | 90  | 2 |
| Tortricidae | <i>Longicornutia epilana</i>     | BOLD:AEL0196 | 3   | 1 |
| Tortricidae | <i>Lozotaenia forsterana</i>     | BOLD:AAB2957 | 39  | 1 |
| Tortricidae | <i>Neocoehylis dubitana</i>      | BOLD:AAC3780 | 65  | 1 |
| Tortricidae | <i>Neocoehylis hybridella</i>    | BOLD:AAJ0623 | 41  | 1 |
| Tortricidae | <i>Notocelia cynosbatella</i>    | BOLD:AAC3246 | 63  | 1 |
| Tortricidae | <i>Notocelia incarnatana</i>     | BOLD:AAE5506 | 29  | 1 |
| Tortricidae | <i>Notocelia roborana</i>        | BOLD:AAE5499 | 35  | 1 |
| Tortricidae | <i>Notocelia rosaecolana</i>     | BOLD:AAC1134 | 59  | 1 |
| Tortricidae | <i>Notocelia trimaculana</i>     | BOLD:AAC1136 | 55  | 1 |
| Tortricidae | <i>Notocelia uddmanniana</i>     | BOLD:AAC1148 | 51  | 1 |
| Tortricidae | <i>Orthotaenia undulana</i>      | BOLD:AAB4021 | 47  | 1 |
| Tortricidae | <i>Pandemis cerasana</i>         | BOLD:AAA3660 | 141 | 1 |
| Tortricidae | <i>Pandemis cinnamomeana</i>     | BOLD:AAD0575 | 37  | 1 |
| Tortricidae | <i>Pandemis corylana</i>         | BOLD:AAC5400 | 61  | 1 |
| Tortricidae | <i>Pandemis dumetana</i>         | BOLD:AAD2733 | 27  | 1 |
| Tortricidae | <i>Pandemis heparana</i>         | BOLD:AAA9254 | 120 | 1 |

|               |                                       |              |     |   |
|---------------|---------------------------------------|--------------|-----|---|
| Tortricidae   | <i>Paramesia gnomana</i>              | BOLD:AAD6396 | 37  | 2 |
| Tortricidae   | <i>Phalonidia manniana</i>            | BOLD:ACF2757 | 4   | 2 |
| Tortricidae   | <i>Phalonidia manniana</i>            | BOLD:AAI6381 | 37  | 1 |
| Tortricidae   | <i>Phaneta pauperana</i>              | BOLD:ACK0213 | 7   | 1 |
| Tortricidae   | <i>Phiaris bipunctana</i>             | BOLD:AAA6005 | 381 | 1 |
| Tortricidae   | <i>Phiaris stibiana</i>               | BOLD:AAO3222 | 7   | 1 |
| Tortricidae   | <i>Piniphila bifasciana</i>           | BOLD:AAC5440 | 55  | 1 |
| Tortricidae   | <i>Pseudosciaphila branderiana</i>    | BOLD:AAD9269 | 24  | 1 |
| Tortricidae   | <i>Ptycholomoides aeriferana</i>      | BOLD:AAE8595 | 22  | 1 |
| Tortricidae   | <i>Rhopobota myrtillana</i>           | BOLD:AAF7996 | 19  | 2 |
| Tortricidae   | <i>Rhopobota naevana</i>              | BOLD:AAA9812 | 777 | 1 |
| Tortricidae   | <i>Rhopobota stagnana</i>             | BOLD:AAF7954 | 30  | 2 |
| Tortricidae   | <i>Rhyacionia pinicolana</i>          | BOLD:AAC4601 | 43  | 1 |
| Tortricidae   | <i>Rhyacionia pinivorana</i>          | BOLD:AAB9878 | 70  | 2 |
| Tortricidae   | <i>Spilonota laricana</i>             | BOLD:AAA7738 | 75  | 1 |
| Tortricidae   | <i>Spilonota ocellana</i>             | BOLD:ABZ4399 | 104 | 1 |
| Tortricidae   | <i>Stictea mygindiana</i>             | BOLD:AAF6742 | 22  | 1 |
| Tortricidae   | <i>Syndemis musculana</i>             | BOLD:ABY7128 | 112 | 2 |
| Tortricidae   | <i>Thiodia citrana</i>                | BOLD:AAE3061 | 23  | 1 |
| Tortricidae   | <i>Xerocnephasia rigana</i>           | BOLD:AER3275 | 12  | 1 |
| Tortricidae   | <i>Zeiraphera griseana</i>            | BOLD:AAA7907 | 401 | 1 |
| Tortricidae   | <i>Zeiraphera isertana</i>            | BOLD:AAD1936 | 99  | 1 |
| Tortricidae   | <i>Zeiraphera ratzeburgiana</i>       | BOLD:AAD8502 | 26  | 1 |
| Tortricidae   | <i>Zeiraphera rufimitrana</i>         | BOLD:AAM3356 | 10  | 1 |
| Yponomeutidae | <i>Cedestis gysseleniella</i>         | BOLD:AAE4109 | 24  | 1 |
| Yponomeutidae | <i>Cedestis subfasciella</i>          | BOLD:AAE9370 | 39  | 1 |
|               | <i>Euhyponomeutoides</i>              |              |     |   |
| Yponomeutidae | <i>albithoracellus</i>                | BOLD:AAF7153 | 39  | 1 |
| Yponomeutidae | <i>Kessleria cottiensis</i>           | BOLD:ABZ2213 | 6   | 1 |
| Yponomeutidae | <i>Kessleria saxifragae</i>           | BOLD:AAI8035 | 22  | 1 |
| Yponomeutidae | <i>Kessleria sp.</i>                  | BOLD:AE4715  | 7   | 6 |
| Yponomeutidae | <i>Paraswammerdamia albicapitella</i> | BOLD:AAN2906 | 22  | 1 |
| Yponomeutidae | <i>Paraswammerdamia nebulella</i>     | BOLD:AAD6975 | 57  | 1 |
| Yponomeutidae | <i>Pseudoswammerdamia combinella</i>  | BOLD:AAV8336 | 10  | 1 |
| Yponomeutidae | <i>Yponomeuta cagnagella</i>          | BOLD:AAA7740 | 410 | 2 |
| Yponomeutidae | <i>Yponomeuta padella</i>             | BOLD:AAA7740 | 410 | 1 |
| Yponomeutidae | <i>Yponomeuta plumbella</i>           | BOLD:AAD9748 | 42  | 1 |
| Yponomeutidae | <i>Zelleria hepariella</i>            | BOLD:AAF6476 | 25  | 1 |
| Ypsolophidae  | <i>Ochsenheimeria sp.</i>             | BOLD:AET5252 | 1   | 1 |
| Ypsolophidae  | <i>Ypsolopha asperella</i>            | BOLD:AAF5823 | 17  | 1 |
| Ypsolophidae  | <i>Ypsolopha nemorella</i>            | BOLD:AAE4873 | 26  | 1 |
| Ypsolophidae  | <i>Ypsolopha parenthesella</i>        | BOLD:AAD3218 | 97  | 2 |
| Ypsolophidae  | <i>Ypsolopha scabrella</i>            | BOLD:AAC7861 | 46  | 1 |
| Ypsolophidae  | <i>Ypsolopha sequella</i>             | BOLD:AAD2598 | 36  | 1 |
| Ypsolophidae  | <i>Ypsolopha sylvella</i>             | BOLD:ACT0005 | 23  | 1 |
| Ypsolophidae  | <i>Ypsolopha ustella</i>              | BOLD:AAD0001 | 251 | 2 |
| Zygaenidae    | <i>Adscita geryon</i>                 | BOLD:ABY4365 | 65  | 2 |

|            |                            |              |     |   |
|------------|----------------------------|--------------|-----|---|
| Zygaenidae | <i>Jordanita budensis</i>  | BOLD:AAF3175 | 21  | 1 |
| Zygaenidae | <i>Zygaena carniolica</i>  | BOLD:AEL6582 | 25  | 1 |
| Zygaenidae | <i>Zygaena exulans</i>     | BOLD:AAD7474 | 34  | 1 |
| Zygaenidae | <i>Zygaena lonicerae</i>   | BOLD:AAD7508 | 41  | 1 |
| Zygaenidae | <i>Zygaena loti</i>        | BOLD:AAD7506 | 53  | 1 |
| Zygaenidae | <i>Zygaena purpuralis</i>  | BOLD:AAE6704 | 119 | 1 |
| Zygaenidae | <i>Zygaena romeo</i>       | BOLD:ADF1340 | 17  | 2 |
| Zygaenidae | <i>Zygaena transalpina</i> | BOLD:ADL6544 | 4   | 2 |
